# Supplementary material for: A systematic review of existing ageism scales
Source: PubMed Central journal article supplement (PMC6745621; doi:10.1016/j.arr.2019.100919), 2019-09
Supplement: mmc1.pdf [file mmc1.pdf]

## **Supplementary materials**

**Supplementary Appendix A**  
**COSMIN definition of measurement properties**

| <b>Measurement property</b>                                                       | <b>Definition</b>                                                                                                                                                                            |
|-----------------------------------------------------------------------------------|----------------------------------------------------------------------------------------------------------------------------------------------------------------------------------------------|
| Content validity                                                                  | The degree to which the content of a scale is an adequate reflection of the construct to be measured                                                                                         |
| Structural validity                                                               | The degree to which the scores of a scale are an adequate reflection of the dimensionality of the construct to be measured                                                                   |
| Internal consistency                                                              | The degree of the interrelatedness among the items                                                                                                                                           |
| Cross-cultural validity/Measurement invariance                                    | The degree to which the performance of the items on a translated or culturally adapted scale are an adequate reflection of the performance of the items of the original version of the scale |
| Reliability                                                                       | The proportion of the total variance in the measurements which is due to ‘true’ differences between participants                                                                             |
| Measurement error                                                                 | The systematic and random error of a participant’s score that is not attributed to true changes in the construct to be measured                                                              |
| Criterion validity                                                                | The degree to which the scores of a scale are an adequate reflection of a ‘gold standard’ or longer version of a scale                                                                       |
| Construct validity ( <i>including both convergent and known groups validity</i> ) | The degree to which the scores of a scale are consistent with hypothesis based on the assumption that the scale validly measures the construct to be measured                                |
| Responsiveness                                                                    | The ability of a scale to detect change over time in the construct to be measured                                                                                                            |

Adapted with permission from (Mokkink et al., 2018)

## Supplementary Appendix B

### COSMIN Guidelines for the Assessment of Each Measurement Property in a Scale

|                      | Rating* | Criteria                                                                                                                                                                                                                                                                                                                                                                                                                                                                                                                                                                                                                                                                                                                                                                                                           |
|----------------------|---------|--------------------------------------------------------------------------------------------------------------------------------------------------------------------------------------------------------------------------------------------------------------------------------------------------------------------------------------------------------------------------------------------------------------------------------------------------------------------------------------------------------------------------------------------------------------------------------------------------------------------------------------------------------------------------------------------------------------------------------------------------------------------------------------------------------------------|
| Content validity     | +       | A clear description of measurement aim, target population, concepts measured, item selection and target population and (investigators or experts) were involved in item selection.                                                                                                                                                                                                                                                                                                                                                                                                                                                                                                                                                                                                                                 |
|                      | ?       | A clear description of above mentioned aspects is lacking OR only target population involved OR doubtful design or methods.                                                                                                                                                                                                                                                                                                                                                                                                                                                                                                                                                                                                                                                                                        |
|                      | -       | No target population involved.                                                                                                                                                                                                                                                                                                                                                                                                                                                                                                                                                                                                                                                                                                                                                                                     |
| Structural validity  | +       | <p><b>CTT</b></p> <p>CFA: CFI or TLI or comparable measure &gt; 0.95 OR RMSEA &lt; 0.06 OR SRMR &lt; 0.08<sup>†</sup></p> <hr/> <p><b>IRT/Rasch</b></p> <p>No violation of unidimensionality<sup>‡</sup>: CFI or TLI or comparable measure &gt; 0.95 OR RMSEA &lt; 0.06 OR SRMR &lt; 0.08</p> <p><i>AND</i></p> <p>no violation of local independence: residual correlations among the items after controlling for the dominant factor &lt; 0.20 OR Q3's &lt; 0.37</p> <p><i>AND</i></p> <p>no violation of monotonicity: adequate looking graphs OR item scalability &gt; 0.30</p> <p><i>AND</i></p> <p>adequate model fit</p> <p>IRT: <math>\chi^2 &gt; 0.001</math></p> <p>Rasch: infit and outfit mean squares <math>\geq 0.5</math> and <math>\leq 1.5</math> OR Z-standardized values &gt; -2 and &lt; 2</p> |
|                      | ?       | <p>CTT: not all information for '+' reported</p> <p>IRT/Rasch: model fit not reported</p>                                                                                                                                                                                                                                                                                                                                                                                                                                                                                                                                                                                                                                                                                                                          |
|                      | -       | Criteria for '+' not met                                                                                                                                                                                                                                                                                                                                                                                                                                                                                                                                                                                                                                                                                                                                                                                           |
| Internal consistency | +       | At least low evidence <sup>§</sup> for sufficient structural validity <sup>‡</sup> AND Cronbach's alpha(s) $\geq 0.70$ for each unidimensional scale or subscale <sup>  </sup>                                                                                                                                                                                                                                                                                                                                                                                                                                                                                                                                                                                                                                     |
|                      | ?       | Criteria for "At least low evidence <sup>§</sup> for sufficient structural validity <sup>‡</sup> " not met                                                                                                                                                                                                                                                                                                                                                                                                                                                                                                                                                                                                                                                                                                         |
|                      | -       | At least low evidence <sup>§</sup> for sufficient structural validity <sup>‡</sup> AND Cronbach's alpha(s) < 0.70 for each unidimensional scale or subscale <sup>  </sup>                                                                                                                                                                                                                                                                                                                                                                                                                                                                                                                                                                                                                                          |
| Reliability          | +       | ICC or weighted Kappa $\geq 0.70$                                                                                                                                                                                                                                                                                                                                                                                                                                                                                                                                                                                                                                                                                                                                                                                  |
|                      | ?       | ICC or weighted Kappa not reported                                                                                                                                                                                                                                                                                                                                                                                                                                                                                                                                                                                                                                                                                                                                                                                 |
|                      | -       | ICC or weighted Kappa < 0.70                                                                                                                                                                                                                                                                                                                                                                                                                                                                                                                                                                                                                                                                                                                                                                                       |

|                                                | <b>Rating*</b> | <b>Criteria</b>                                                                                                                                                                         |
|------------------------------------------------|----------------|-----------------------------------------------------------------------------------------------------------------------------------------------------------------------------------------|
| Measurement error                              | +              | SDC or LoA < MIC <sup>†</sup>                                                                                                                                                           |
|                                                | ?              | MIC not defined                                                                                                                                                                         |
|                                                | –              | SDC or LoA > MIC <sup>†</sup>                                                                                                                                                           |
| Hypotheses testing for construct validity      | +              | The result is in accordance with the hypothesis**                                                                                                                                       |
|                                                | ?              | No hypothesis defined (by the review team) <sup>††</sup>                                                                                                                                |
|                                                | –              | The result is not in accordance with the hypothesis**                                                                                                                                   |
| Cross-cultural validity/measurement invariance | +              | No important differences found between group factors (such as age, gender, language) in multiple group factor analysis OR no important DIF for group factors (McFadden's $R^2 < 0.02$ ) |
|                                                | ?              | No multiple group factor analysis OR DIF analysis performed                                                                                                                             |
|                                                | –              | Important differences between group factors OR DIF was found                                                                                                                            |
| Criterion validity                             | +              | Correlation with gold standard $\geq 0.70$ OR AUC $\geq 0.70$                                                                                                                           |
|                                                | ?              | Not all information for '+' reported                                                                                                                                                    |
|                                                | –              | Correlation with gold standard $< 0.70$ OR AUC $< 0.70$                                                                                                                                 |
| Responsiveness                                 | +              | The result is in accordance with the hypothesis** OR AUC $\geq 0.70$                                                                                                                    |
|                                                | ?              | No hypothesis defined (by the review team) <sup>††</sup>                                                                                                                                |
|                                                | –              | The result is not in accordance with the hypothesis** OR AUC $< 0.70$                                                                                                                   |

Reprinted with permission from (Mokkink et al., 2018)

AUC: Area under the curve, CFA: Confirmatory factor analysis, CFI: Comparative fit index, CTT: Classical test theory, DIF: Differential item functioning, ICC: Intraclass correlation coefficient, IRT: Item response theory, LoA: Limits of agreement, MIC: Minimal important change, RMSEA: Root Mean Square Error of Approximation, SEM: Standard Error of Measurement, SDC: Smallest detectable change, SRMR: Standardized Root Mean Residuals, TLI: Tucker-Lewis Index

\* "+" = sufficient, "-" = insufficient, "?" = indeterminate

<sup>†</sup> To rate the quality of the summary score, the factor structures should be equal across studies

<sup>‡</sup> Unidimensionality refers to a factor analysis per subscale, while structural validity refers to a factor analysis of a (multidimensional) patient-reported outcome measure

<sup>§</sup> As defined by grading the evidence according to the GRADE approach

<sup>¶</sup> This evidence may come from different studies

<sup>||</sup> The criteria 'Cronbach alpha < 0.95' was deleted, as this is relevant in the development phase of a PROM and not when evaluating an existing PROM.

<sup>\*\*</sup> The results of all studies should be taken together, and it should then be decided if 75% of the results are in accordance with the hypotheses

<sup>††</sup> We relied on hypotheses specified by the authors, rather than the review team

**Supplementary Appendix C**  
**Aggregated Grading of the Quality of Evidence for each Measurement Property per Scale**

| Quality of evidence                                                                | Lower if                                                                                                                                                                                                                                                                                                                                                                                                                                                                                                                                                                                                                                                                                                                  |
|------------------------------------------------------------------------------------|---------------------------------------------------------------------------------------------------------------------------------------------------------------------------------------------------------------------------------------------------------------------------------------------------------------------------------------------------------------------------------------------------------------------------------------------------------------------------------------------------------------------------------------------------------------------------------------------------------------------------------------------------------------------------------------------------------------------------|
| <p><b>High</b></p> <p><b>Moderate</b></p> <p><b>Low</b></p> <p><b>Very low</b></p> | <p><b>Risk of Bias</b></p> <p>-1 <b>Serious</b> (multiple studies of doubtful quality or only one study of adequate quality)</p> <p>-2 <b>Very Serious</b> (multiple studies of inadequate quality or only one study of doubtful quality)</p> <p>-3 <b>Extremely Serious</b> (there is only one study of inadequate quality)</p> <p><b>Inconsistency</b></p> <p>-1 <b>Serious</b> (inconsistent results across studies OR inconsistent number of items and sub-scales proposed across studies)</p> <p>-2 <b>Very Serious</b> (inconsistent results across studies or inconsistent number of items AND sub-scales proposed across studies)</p> <p><b>Imprecision</b></p> <p>-1 total n=50/100</p> <p>-2 total n &lt;50</p> |

Adapted with permission from (Mokkink et al., 2018)

**Supplementary Table 1**  
**Study Characteristics**

| Author                                       | Specific questionnaire                          | Age range (M, SD)                                                             | Gender (% female)                    | Population type                                                                      | Country     | Language | N (measurement property tested)                                                                                                                                                                                                                   | Sampling method                                | Response rate                         |
|----------------------------------------------|-------------------------------------------------|-------------------------------------------------------------------------------|--------------------------------------|--------------------------------------------------------------------------------------|-------------|----------|---------------------------------------------------------------------------------------------------------------------------------------------------------------------------------------------------------------------------------------------------|------------------------------------------------|---------------------------------------|
| <b>Aging Perceptions Questionnaire (APQ)</b> |                                                 |                                                                               |                                      |                                                                                      |             |          |                                                                                                                                                                                                                                                   |                                                |                                       |
| (Barker et al., 2007)                        | APQ                                             | (M=74.1, SD=6.8)                                                              | 57%                                  | Community dwelling adults                                                            | Ireland     | English? | 2033 (Structural validity, internal consistency)                                                                                                                                                                                                  | Random                                         | 68%                                   |
| (Barker et al., 2007)                        | APQ                                             | Not reported                                                                  | Not reported                         | Community dwelling adults above 65 years                                             | Ireland     | English? | 143 (Reliability, construct validity - convergent)                                                                                                                                                                                                | Not reported                                   | Not reported                          |
| (Barker et al., 2007)                        | APQ                                             | Not reported                                                                  | Not reported                         | Expert clinicians and researchers in aging                                           | Ireland     | English? | 16 (Content validity - scale development)                                                                                                                                                                                                         | Convenient                                     | Not reported                          |
| (Barker et al., 2007)                        | APQ                                             | Not reported                                                                  | Not reported                         | Community dwelling adults above 65 years                                             | Ireland     | English? | 129 (Content validity? - pilot test psychometric properties)                                                                                                                                                                                      | Convenient?                                    | Not reported                          |
| (Ingrand et al., 2012)                       | APQ                                             | Subgroup 1= 65 to 106 (M=77.4, SD=8.2). Subgroup 2= 54 to 64 (M=59.8, SD=2.8) | 56% (Subgroup 1=58%; Subgroup 2=53%) | All inhabitants of Neuville de Poitou aged 55 years or more                          | France      | French   | 656, including Subgroup 1 with participants aged 65+ (394), and Subgroup 2 with participants aged 55 to 65 (262). (Structural validity, internal consistency, cross-cultural validity/ measurement invariance, construct validity - known groups) | Total population, sampling all inhabitants 55+ | Subgroup 1=97%; Subgroup 2=98%        |
| (Sexton et al., 2014)                        | Brief Ageing Perceptions Questionnaire (B-APQ)  | 56 to 70                                                                      | 54%                                  | Community dwelling individuals aged 50+                                              | Ireland     | English? | 6718 (Structural validity, internal consistency, criterion validity, construct validity - convergent)                                                                                                                                             | Representative 50+                             | 62%?                                  |
| (Slotman et al., 2015)                       | Aging Perceptions Questionnaire – Short (APQ-S) | 70 to 99 (M=78.59, SD=6.17)                                                   | 57%                                  | Community dwelling older people in different neighborhoods in Rotterdam              | Netherlands | Dutch    | 1280 (Structural validity, internal consistency, cross-cultural validity/measurement invariance, criterion validity, construct validity - convergent & known groups)                                                                              | Random                                         | 46%                                   |
| (Chen et al., 2016)                          | APQ                                             | (M=71.80, SD=6.48)                                                            | 53%                                  | Not reported                                                                         | China       | Chinese  | 94 (Content validity? - pilot test) of which 30 (reliability)                                                                                                                                                                                     | Convenient                                     | 94% (pilot study); 100% (reliability) |
| (Chen et al., 2016)                          | APQ                                             | Not reported                                                                  | Not reported                         | Gerontology expert, linguistics expert, psychologists, nursing psychological experts | China       | Chinese  | 7 (Content validity - adaptation of questionnaire to Chinese context)                                                                                                                                                                             | Convenient?                                    | Not reported                          |
| (Chen et al., 2016)                          | APQ                                             | Not reported                                                                  | Not reported                         | Older adults 65+                                                                     | China       | Chinese  | 20 (Content validity - pilot test clarity and intelligibility)                                                                                                                                                                                    | Convenient 65+                                 | Not reported                          |

| Author                  | Specific questionnaire | Age range (M, SD)                                                                  | Gender (% female)                | Population type                                                                                                                | Country     | Language | N (measurement property tested)                                                                                                                                                                         | Sampling method                          | Response rate |
|-------------------------|------------------------|------------------------------------------------------------------------------------|----------------------------------|--------------------------------------------------------------------------------------------------------------------------------|-------------|----------|---------------------------------------------------------------------------------------------------------------------------------------------------------------------------------------------------------|------------------------------------------|---------------|
| (Chen et al., 2016)     | APQ                    | EFA sample (M=72.38, SD=6.536); CFA sample (M=73.75, SD=6.767)                     | EFA sample= 52%; CFA sample= 53% | Not reported                                                                                                                   | China       | Chinese  | 758 including two sub-samples to conduct exploratory factor analysis (EFA) and confirmatory factor analysis (CFA) for the assessment of structural validity (Structural validity, internal consistency) | Convenient                               | 84%           |
| (Moghadam et al., 2016) | B-APQ                  | Not reported                                                                       | Not reported                     | Clinical psychologist, psychiatrist, assistant professors in nursing, assistant professors experienced in questionnaire design | Iran        | Persian  | 8 (Content validity)                                                                                                                                                                                    | Convenient?                              | Not reported  |
| (Moghadam et al., 2016) | B-APQ                  | Not reported                                                                       | Not reported                     | Older adults                                                                                                                   | Iran        | Persian  | 10 (Content validity - pilot test understandability)                                                                                                                                                    | Convenient?                              | Not reported  |
| (Moghadam et al., 2016) | B-APQ                  | 60 to 75 (72.8% of sample); 76 to 90 (24.4% of sample); 90+ years (2.8% of sample) | 49%                              | Community dwelling older adults >60 years living in Gonabald, Iran and recruited from health centres                           | Iran        | Persian  | 400 (structural validity, internal consistency) of which 20 (reliability)                                                                                                                               | Two-stage random cluster sampling method | 95%           |
| (Slotman et al., 2017)  | APQ-S                  | 65 to 99 (M=72.82, SD=5.21)                                                        | 45%                              | Community-dwelling Turkish migrants who resided in Rotterdam                                                                   | Netherlands | Turkish  | 428 (Structural validity, internal consistency, cross-cultural validity/measurement invariance, construct validity - convergent & known groups)                                                         | Unclear                                  | 20%           |

**Aging Semantic Differential (ASD)**

|                                |     |                                                                        |              |                                                                     |        |          |                                                                                                                                    |              |              |
|--------------------------------|-----|------------------------------------------------------------------------|--------------|---------------------------------------------------------------------|--------|----------|------------------------------------------------------------------------------------------------------------------------------------|--------------|--------------|
| (Rosencranz and McNevin, 1969) | ASD | 17 to 21                                                               | Not reported | University students                                                 | USA    | English  | 200 (Content validity)                                                                                                             | Not reported | Not reported |
| (Rosencranz and McNevin, 1969) | ASD | Not reported                                                           | Not reported | University students                                                 | USA    | English  | 287 (Structural validity, construct validity - known groups)                                                                       | Not reported | Not reported |
| (Underwood et al., 1985)       | ASD | Not reported                                                           | Approx. 99%  | University students                                                 | USA    | English? | 184 (Structural validity)                                                                                                          | Convenient   | Not reported |
| (Gekoski et al., 1991)         | ASD | Not reported                                                           | Not reported | University students                                                 | Canada | English? | 100 (Structural validity)                                                                                                          | Convenient   | Not reported |
| (O'Hanlon et al., 1993)        | ASD | Young age group=20 to 30 (M=20.3, SD=2.87); Middle-aged group=31 to 53 | 64%          | Adults of all ages attending four different colleges in New Orleans | USA    | English? | 387, including three separate age groups: young (279), middle-aged (50), old (58).(Construct validity - convergent & known groups) | Convenient   | Not reported |

| Author                       | Specific questionnaire                                                 | Age range (M, SD)                                                   | Gender (% female) | Population type                                                                                                | Country | Language                           | N (measurement property tested)                                                                                                                                                                                                                                                                                                                                                         | Sampling method                                | Response rate |
|------------------------------|------------------------------------------------------------------------|---------------------------------------------------------------------|-------------------|----------------------------------------------------------------------------------------------------------------|---------|------------------------------------|-----------------------------------------------------------------------------------------------------------------------------------------------------------------------------------------------------------------------------------------------------------------------------------------------------------------------------------------------------------------------------------------|------------------------------------------------|---------------|
|                              |                                                                        | <i>(M=38.2, SD=5.33); Old age group=64 to 85 (M=70.03, SD=5.33)</i> |                   |                                                                                                                |         |                                    |                                                                                                                                                                                                                                                                                                                                                                                         |                                                |               |
| (Intrieri et al., 1995)      | ASD                                                                    | (M=26.2, SD=3.76)                                                   | 24%               | Third year medical students enrolled in a geriatric training programme                                         | USA     | English?                           | 100 (Structural validity, internal consistency)                                                                                                                                                                                                                                                                                                                                         | Convenient                                     | 76%           |
| (Villar Posada, 1997)        | Spanish version of the ASD (Diferencial Semántico del envejecimiento ) | 20 to 56 (M=31.1)                                                   | 53%               | People living in the metropolitan area of Barcelona                                                            | Spain   | Spanish                            | 82 (Content validity - pilot test)                                                                                                                                                                                                                                                                                                                                                      | Purposeful sampling                            | Not reported  |
| (Villar Posada, 1997)        | Spanish version of the ASD (Diferencial Semántico del envejecimiento ) | 15-no upper age limit                                               | Approx. 50%       | Community dwellers living in the metropolitan area of Barcelona                                                | Spain   | Spanish                            | 166 (Structural validity, internal consistency, construct validity - convergent)                                                                                                                                                                                                                                                                                                        | Purposeful sampling considering gender and age | Not reported  |
| (Polizzi and Millikin, 2002) | The Refined Aging Semantic Differential (R-ASD)                        | 18 to 23 years                                                      | 84%               | Undergraduate students enrolled in education and psychology courses at a southern liberal arts university      | USA     | English?                           | 142 including three sub-samples, each responding to a differently worded target (Construct validity - known groups)                                                                                                                                                                                                                                                                     | Convenient                                     | 100%          |
| (Polizzi, 2003)              | R-ASD                                                                  | Not reported                                                        | Not reported      | Doctoral level experts in the areas of adult development and aging, psycholinguistics, and cultural diversity. | USA     | English?                           | 9+ people (Content validity)                                                                                                                                                                                                                                                                                                                                                            | Convenient?                                    | Not reported  |
| (Polizzi, 2003)              | R-ASD                                                                  | 17 to 22                                                            | 55%               | University students                                                                                            | USA     | English?                           | 300 (Structural validity, internal consistency)                                                                                                                                                                                                                                                                                                                                         | Convenient                                     | Not reported  |
| (Polizzi, 2003)              | R-ASD                                                                  | 17 to 22                                                            | 60%               | University students                                                                                            | USA     | English?                           | 50 (Reliability)                                                                                                                                                                                                                                                                                                                                                                        | Convenient                                     | Not reported  |
| (Stewart et al., 2007)       | ASD                                                                    | Not reported                                                        | Not reported      | Medical students (2 cohorts as quasi control, 2 cohorts as treatment)                                          | USA     | English? Not specifically reported | Quasi control Group1 test time 1=53; Quasi-control Group 1 test time 2= 73; Quasi control Group2 test time 1=55; Quasi-control Group 2 test time 2= 63; Intervention Group 1 test time 1=70; Intervention Group 1 test time 2=68; Intervention Group 1 test time 3=65; Intervention Group 2 test time 1=71; Intervention Group 2 test time 2=68. (Internal consistency, responsiveness) | Not reported                                   | Not reported  |



| Author                                 | Specific questionnaire | Age range (M, SD)                                                                 | Gender (% female)                  | Population type                                                                                                                                                | Country | Language | N (measurement property tested)                                                                                                                                                                                          | Sampling method | Response rate                            |
|----------------------------------------|------------------------|-----------------------------------------------------------------------------------|------------------------------------|----------------------------------------------------------------------------------------------------------------------------------------------------------------|---------|----------|--------------------------------------------------------------------------------------------------------------------------------------------------------------------------------------------------------------------------|-----------------|------------------------------------------|
| (Iwasaki and Jones, 2008)              | R-ASD                  | (M=21.6, SD=3.8)                                                                  | 54%                                | Undergraduate college students enrolled in counseling psychology                                                                                               | USA     | English? | 512 (Internal consistency, Construct validity - convergent)                                                                                                                                                              | Convenient      | Not reported                             |
| (Iwasaki and Jones, 2008)              | R-ASD                  | (M=21.2, SD=4.57)                                                                 | 60%                                | College students-various courses                                                                                                                               | USA     | English? | 733 (Structural validity)                                                                                                                                                                                                | Convenient      | 93%                                      |
| (Boudjemad and Gana, 2009)             | ASD                    | (M=23.17, SD=6.25)                                                                | Not reported                       | Bilingual students                                                                                                                                             | France? | French   | 32 (Internal consistency, cross-cultural validity/measurement invariance)                                                                                                                                                | Convenient?     | Not reported                             |
| (Gluth et al., 2010)                   | ASD                    | Younger group=18 to 31 (M=24.8, SD=3.1); Older group=68 to 81(M=73.4, SD=3.1)     | Younger group=56%; Older group=57% | Younger and older German participants recruited through posters or handouts posted and distributed at grocery stores and swimming pools, and ads in newspapers | Germany | German   | 294 including a younger age sub-group (151) and an older age sub-group (143).(Structural validity, internal consistency, cross-cultural validity/measurement invariance, construct validity - convergent & known groups) | Convenient      | Not reported                             |
| (Gonzales et al., 2010)                | R-ASD                  | Not reported                                                                      | Not reported                       | Social gerontologist and graduate students in gerontology                                                                                                      | USA     | English? | 3 (Content validity)                                                                                                                                                                                                     | Not reported    | Not reported                             |
| (Gonzales et al., 2010)                | R-ASD                  | 21 to 37                                                                          | Not reported                       | Medical students from eight universities across the country                                                                                                    | USA     | English? | 112 (Content validity)                                                                                                                                                                                                   | Not reported    | 42%                                      |
| (Gonzales et al., 2010)                | R-ASD                  | 21 to 37 (M=24, SD=2.4)                                                           | 61%                                | Medical students from eight universities across the country                                                                                                    | USA     | English? | 199 (Structural validity, internal consistency)                                                                                                                                                                          | Convenient?     | Not reported                             |
| (Carlson, 2015)                        | R-ASD                  | Not reported                                                                      | Not reported                       | Graduate students                                                                                                                                              | USA     | English? | 19 (Content validity)                                                                                                                                                                                                    | Not reported    | Not reported                             |
| (Carlson, 2015)                        | R-ASD                  | Sub-group A= 17 to 25 (89% of sub-group); Sub-group B= 17 to 25(85% of sub-group) | Sub-group A=66%; Sub-group B= 60%  | University students                                                                                                                                            | USA     | English? | Two subgroups: sub-group A tested 5-point Likert scale (258) and Sub-group B tested 11-point Likert scale (233). (Structural validity, internal consistency, construct validity -convergent & known groups)              | Convenient      | Sub-group A: 94%; Sub-group B Likert 90% |
| (Gonzales et al., 2017)                | ASD                    | 18 to 36 (M=21.6, SD=2.2)                                                         | 69%                                | College students (undergraduate and graduate students) at same university in Shanghai                                                                          | China   | Mandarin | 380 (Structural validity, internal consistency, cross-cultural validity/measurement invariance)                                                                                                                          | Convenient      | 100%                                     |
| <b>Anxiety about Aging Scale (AAS)</b> |                        |                                                                                   |                                    |                                                                                                                                                                |         |          |                                                                                                                                                                                                                          |                 |                                          |
| (Lasher, 1987)                         | AAS                    | Not reported                                                                      | Not reported                       | Psychology graduates                                                                                                                                           | USA     | English? | 3 (Content validity)                                                                                                                                                                                                     | Not reported    | Not reported                             |

| Author                        | Specific questionnaire                     | Age range (M, SD)                                           | Gender (% female)                                                                                          | Population type                                                                                                                                                           | Country        | Language | N (measurement property tested)                                                                                                                                                                                               | Sampling method                                                                    | Response rate                                                                          |
|-------------------------------|--------------------------------------------|-------------------------------------------------------------|------------------------------------------------------------------------------------------------------------|---------------------------------------------------------------------------------------------------------------------------------------------------------------------------|----------------|----------|-------------------------------------------------------------------------------------------------------------------------------------------------------------------------------------------------------------------------------|------------------------------------------------------------------------------------|----------------------------------------------------------------------------------------|
| (Lasher, 1987)                | AAS                                        | Not reported for whole sample                               | 35%                                                                                                        | Students in undergraduate psychology courses and from Foster Grandparent Program                                                                                          | USA            | English? | 312 including seven age groups: <25 (n=46), 25 to 34 (n=47), 35 to 44 (n=46), 45 to 54 (n=56), and 55 to 64 (n=39). (Structural validity, internal consistency, construct validity - convergent & known groups)               | Convenient & snowballing                                                           | 84.8%                                                                                  |
| (Watkins et al., 1998)        | AAS                                        | 65 to 74 (49%); 75 to 87 (51%)                              | 71.50%                                                                                                     | Community dwelling older adults                                                                                                                                           | Australia      | English? | 123 (Structural validity, internal consistency, cross-cultural validity/measurement invariance, construct validity - known groups)                                                                                            | Convenient                                                                         | 96%                                                                                    |
| (Rivera-Ledesma et al., 2007) | AAS                                        | (M=63.8, SD=8.7)                                            | 55%                                                                                                        | Older adults selected based on their availability in a health clinic in Mexico City. It was subjects who attended the clinic for a routine checkup or a follow up visit.  | Mexico         | Spanish  | 234 (Structural validity, internal consistency, construct validity - convergent)                                                                                                                                              | Convenient                                                                         | Not reported                                                                           |
| (Rivera-Ledesma et al., 2007) | Revised Anxiety about Ageing Scale (R-AAS) | (M=63, SD=8.2)                                              | 54%                                                                                                        | Older adults selected based on their availability in a health clinic in Mexico City. It was subjects who attended the clinic for a routine check up or a follow up visit. | Mexico         | Spanish  | 151 (Structural validity, internal consistency, construct validity - convergent)                                                                                                                                              | Convenient                                                                         | Not reported                                                                           |
| (Gao, 2012)                   | AAS                                        | Students= 19 to 32 (M=20.6), Older adults=50 to 84 (M=62.9) | 62%                                                                                                        | Psychology students from two universities, and older adults-volunteers from two community colleges                                                                        | China (Taiwan) | Chinese  | 334, including students (176) and older adults (158). (Structural validity, internal consistency, cross-cultural validity/measurement invariance, construct validity - known groups)                                          | Convenient                                                                         | Not reported                                                                           |
| (Koukoulis et al., 2013)      | AAS                                        | Not reported                                                | Health and social care professionals (68%); Senior undergraduate students (85%); Community residents (50%) | Health and social care professionals; senior undergraduate students enrolled in the Health and Social Welfare School of TEI of Crete; community workers living in Crete   | Greece         | Greek    | 320, including three sub-samples: health and social care professionals (147), senior undergraduate students (74) and community residents (99). (Structural validity, internal consistency, construct validity - known groups) | Professionals and students: Convenient? Sample of community residents: snowballing | Health and social care professionals (>80%); Students (86%); Community residents (50%) |
| (Sargent-Cox et al., 2014)    | AAS                                        | (M=57.3, SD=13.66)                                          | 42%                                                                                                        | Residents of Australian Capital Territory                                                                                                                                 | Australia      | English? | 783 (Structural validity, internal consistency, cross-cultural validity/measurement invariance)                                                                                                                               | Random                                                                             | 23.5% respondents; of these 84.3% complete cases                                       |

| Author                                         | Specific questionnaire | Age range (M, SD)                              | Gender (% female)               | Population type                                                                                                                      | Country           | Language     | N (measurement property tested)                                                                                                  | Sampling method                                                                                                                                                | Response rate                     |
|------------------------------------------------|------------------------|------------------------------------------------|---------------------------------|--------------------------------------------------------------------------------------------------------------------------------------|-------------------|--------------|----------------------------------------------------------------------------------------------------------------------------------|----------------------------------------------------------------------------------------------------------------------------------------------------------------|-----------------------------------|
| <b>Attitudes to Ageing Questionnaire (AAQ)</b> |                        |                                                |                                 |                                                                                                                                      |                   |              |                                                                                                                                  |                                                                                                                                                                |                                   |
| (Laidlaw et al., 2007)                         | AAQ                    | 60+                                            | Approx. 66%                     | Older adults                                                                                                                         | UK (Scotland)     | English?     | 35+ (Content validity)                                                                                                           | Convenient                                                                                                                                                     | Not reported                      |
| (Laidlaw et al., 2007)                         | AAQ                    | >60 in the older adults' groups                | 50% in the older adults' groups | 15 centers*(4 groups of older adults, 1 group of carers, 1 group of health care professionals)                                       | Several countries | English?     | About 6 focus groups in 15 centers (Content validity)                                                                            | Not reported                                                                                                                                                   | Not reported                      |
| (Laidlaw et al., 2007)                         | AAQ                    | 60 to 99                                       | 60%                             | WHOQOL-OLD centres: older adults                                                                                                     | Several countries | Not reported | 1,356 (Structural validity, cross-cultural validity/measurement invariance)                                                      | Convenient                                                                                                                                                     | Not reported                      |
| (Laidlaw et al., 2007)                         | AAQ                    | 60 to 100                                      | 59%                             | WHOQOL-OLD centres: older adults                                                                                                     | Several countries | Not reported | 5,566 (Structural validity, internal consistency, cross-cultural validity/measurement invariance)                                | Convenient                                                                                                                                                     | Not reported (83% complete cases) |
| (Chachamovich et al., 2008)                    | AAQ                    | 60 to 69                                       | 59%                             | Not reported                                                                                                                         | Brazil            | Portuguese?  | 143 (Content validity)                                                                                                           | Convenient                                                                                                                                                     | Not reported                      |
| (Chachamovich et al., 2008)                    | AAQ                    | 60 to 69 (41%); 70 to 79 (36%); 80 to 89 (23%) | 64%                             | Older adults recruited from a university hospital, community houses and nursing homes, elderly community groups, and their own homes | Brazil            | Portuguese?  | 424 (Structural validity, internal consistency, cross-cultural validity/measurement invariance, construct validity - convergent) | Convenient                                                                                                                                                     | Not reported                      |
| (Kalfoss et al., 2010)                         | AAQ                    | 60 to 95 (M=72.32, SD=7.8)                     | 54%                             | Community dwellers, 60+ years old                                                                                                    | Canada            | English      | 202 (Structural validity, internal consistency, construct validity - convergent & known groups)                                  | Convenient                                                                                                                                                     | 48%                               |
| (Kalfoss et al., 2010)                         | AAQ                    | 60 to 91 (M=77.62, SD=7.2)                     | 57%                             | Community dwellers and those receiving health care services                                                                          | Norway            | Norwegian    | 490 (Structural validity, internal consistency, construct validity - convergent & known groups)                                  | A cohort of randomly selected stratified older adults from 20 communities; and another cohort of randomly selected older adults receiving health care services | Approx. 53%                       |
| (Lucas-Carrasco et al., 2013)                  | AAQ                    | (M= 71.1, SD=7.1)                              | 60%                             | Community dwellers 60+ recruited from community centres, primary care centres,                                                       | Spain             | Spanish      | 242 (Structural validity, internal consistency, construct validity - convergent & known groups)                                  | Convenient                                                                                                                                                     | Not reported                      |

| Author                     | Specific questionnaire | Age range (M, SD)                                                                       | Gender (% female)                            | Population type                                                                                                     | Country            | Language | N (measurement property tested)                                                                                                                                                     | Sampling method                                          | Response rate                                |
|----------------------------|------------------------|-----------------------------------------------------------------------------------------|----------------------------------------------|---------------------------------------------------------------------------------------------------------------------|--------------------|----------|-------------------------------------------------------------------------------------------------------------------------------------------------------------------------------------|----------------------------------------------------------|----------------------------------------------|
| (Shenkin et al., 2014)     | AAQ                    | (M=74.0, SD=0.28)                                                                       | 48%                                          | Community dwellers (the Lothian Birth Cohort 1936)                                                                  | UK (Scotland)      | English  | 802 (Structural validity, internal consistency, construct validity - convergent)                                                                                                    | The Lothian Birth Cohort 1936 - participants of 2nd wave | 95.3%                                        |
| (Brown et al., 2015)       | AAQ                    | 40 to 60 (M = 52.1, SD = 5.49); and 60 to 98 (M = 71.3, SD = 7.69)                      | 100%                                         | Community dwellers aged between 18 and 98 recruited from the Australian electoral roll                              | Australia?         | English? | 776, including two sub-groups of midlife women (571) and older women (259). (Structural validity, cross-cultural validity/ measurement invariance, construct validity - convergent) | Random                                                   | Older group ( 34.9%); younger group (35.7%)  |
| (Helmes and Pachana, 2016) | AAQ                    | Canadian sample: 50 to 94 (M=70.3, SD=8.88). Australian sample: 50 to 90 (not reported) | Canadian sample: 69%. Australian sample: 74% | Both Canadian and Australian samples: Community dwelling older adults                                               | Canada & Australia | English? | Canadian sample: 172 Australian sample: 195 (Internal consistency, construct validity - convergent)                                                                                 | Convenient                                               | Canadian sample: 56%; Australian sample: 95% |
| (Marquet et al., 2016)     | AAQ                    | (M=73.84, SD=8.66)                                                                      | 66%                                          | French speaking older people living in Belgium                                                                      | Belgium            | French   | 238 (Structural validity, internal consistency, reliability, construct validity - convergent & known groups)                                                                        | Convenient                                               | Not reported                                 |
| (Rejeh et al., 2017)       | AAQ                    | Not reported                                                                            | Not reported                                 | Older adults                                                                                                        | Iran               | Farsi    | 15 (Content validity)                                                                                                                                                               | Not reported                                             | Not reported                                 |
| (Rejeh et al., 2017)       | AAQ                    | Not reported                                                                            | Not reported                                 | Specialists (1 geriatrician, 1 psychologist, 3 associate professors in nursing, 1 questionnaire development expert) | Iran               | Farsi    | 6 (Content validity)                                                                                                                                                                | Not reported                                             | Not reported                                 |
| (Rejeh et al., 2017)       | AAQ                    | (M=67.39, SD=6.14)                                                                      | 54%                                          | Community dwellers, members of citizen clubs                                                                        | Iran               | Farsi    | 400 (Structural validity, internal consistency, construct validity - known groups). And a sub-sample of 80 (reliability).                                                           | Random sampling within clubs in 4 regions of Tehran      | Not reported                                 |

**Expectations Regarding Aging (ERA)**

|                          |     |                                                                   |                                                    |                                                                                                                                                           |     |         |                                                                                                    |            |                  |
|--------------------------|-----|-------------------------------------------------------------------|----------------------------------------------------|-----------------------------------------------------------------------------------------------------------------------------------------------------------|-----|---------|----------------------------------------------------------------------------------------------------|------------|------------------|
| (Sarkisian et al., 2001) | ERA | 65 to 91 (M=78) in the older adults group. 30 to 51 (M=37) in the | 34% for older adult group. 54% for physician group | Older adults aged 65+ attending community-based senior centers in which most clients spoke English. Also full time primary care physicians working in the | USA | English | 49 including 38 older adults and 11 primary care clinicians. (Content validity - PROM development) | Convenient | 80% older adults |
|--------------------------|-----|-------------------------------------------------------------------|----------------------------------------------------|-----------------------------------------------------------------------------------------------------------------------------------------------------------|-----|---------|----------------------------------------------------------------------------------------------------|------------|------------------|

| Author                   | Specific questionnaire | Age range (M, SD)                              | Gender (% female)                 | Population type                                                                                                                                                                 | Country   | Language            | N (measurement property tested)                                                                                                                                           | Sampling method                                                              | Response rate |
|--------------------------|------------------------|------------------------------------------------|-----------------------------------|---------------------------------------------------------------------------------------------------------------------------------------------------------------------------------|-----------|---------------------|---------------------------------------------------------------------------------------------------------------------------------------------------------------------------|------------------------------------------------------------------------------|---------------|
| (Sarkisian et al., 2001) | ERA                    | Not reported                                   | Focus groups of older adults 100% | division of geriatrics and general internal medicine<br>Community based older adults from different socioeconomic and demographic backgrounds                                   | USA       | English             | 6 older adults for individual interviews, and 12 older women for a focus group discussion. (Content validity - PROM development)                                          | Convenient?                                                                  | Not reported  |
| (Sarkisian et al., 2002) | ERA-38                 | M=76                                           | 54%                               | Community residing older adults (>65 years) cared for by primary care physicians                                                                                                | USA       | English             | 429 (Content validity, internal consistency, construct validity - convergent & known groups)                                                                              | Random sample from each physician, but physicians were not randomly selected | 73%           |
| (Sarkisian et al., 2002) | ERA                    | M=78 (older adults in focus group discussions) | Not reported                      | Older adults and physicians                                                                                                                                                     | USA       | English             | 38 older adults and an unknown number of physicians for focus group discussions, 6 interviewees (Content validity - PROM development)                                     | Not reported                                                                 | Not reported  |
| (Sarkisian et al., 2002) | ERA                    | Not reported                                   | Not reported                      | Older adults in 2 senior centers                                                                                                                                                | USA       | English             | 58 (Content validity - pilot)                                                                                                                                             | Not reported                                                                 | Not reported  |
| (Sarkisian et al., 2005) | ERA-38 & ERA-12        | (M=76, SD=6.9)                                 | 54%                               | Community residing older adults (>65 years) cared by primary care physicians                                                                                                    | USA       | English             | 429 (Content validity, structural validity, internal consistency, criterion validity, construct validity – convergent & known groups)                                     | Random sample from each physician                                            | 73%           |
| (Sarkisian et al., 2005) | ERA-38 & ERA-12        | (M=77.5, SD=6.5)                               | 77%                               | Older adults aged 65 years and older at 14 senior centers and able to speak either English or Spanish                                                                           | USA       | English and Spanish | 636 (Structural validity, internal consistency, cross cultural validity/measurement invariance, construct validity-convergent & known groups). 20% of these (reliability) | Convenient?                                                                  | 85%           |
| (Joshi et al., 2010)     | ERA-12                 | 41 to 62 (41 to 51=43.4%, 52 to 62=63.6%)      | 64%                               | Middle-aged individuals able to read and understand English, seeking treatment in polyclinics, and including 3 main ethnic groups (i.e. Chinese, Malay and Indian) in Singapore | Singapore | English             | 981 (Structural validity, internal consistency, construct validity-convergent & known groups)                                                                             | Not reported                                                                 | 48.3%         |
| (Beser et al., 2012)     | ERA-12                 | Not reported                                   | Not reported                      | 1 family physician, 8 faculty members nursing school, 1 clinical nurse                                                                                                          | Turkey    | Turkish             | 10 (Content validity)                                                                                                                                                     | Convenient?                                                                  | Not reported  |
| (Beser et al., 2012)     | ERA-12                 | Not reported                                   | Not reported                      | Older adults 65+                                                                                                                                                                | Turkey    | Turkish             | 10 (Content validity - pilot)                                                                                                                                             | Convenient?                                                                  | Not reported  |

| Author                | Specific questionnaire                                                                              | Age range (M, SD)             | Gender (% female) | Population type                                                                                                                                                             | Country | Language | N (measurement property tested)                                                    | Sampling method | Response rate |
|-----------------------|-----------------------------------------------------------------------------------------------------|-------------------------------|-------------------|-----------------------------------------------------------------------------------------------------------------------------------------------------------------------------|---------|----------|------------------------------------------------------------------------------------|-----------------|---------------|
| (Beser et al., 2012)  | ERA-12                                                                                              | 65 to 86 (M=71.68, SD=5.37)   | 54%               | People aged 65 and above, living in Izmir, and with no hearing or speaking problems                                                                                         | Turkey  | Turkish  | 120 (Structural validity, internal consistency)                                    | Convenient?     | Not reported  |
| (Sparks et al., 2013) | ERA-38, with two underlying scales: Aging Self Expectations-ASE, and General Aging Expectations-GAE | 45 to 74 (M=59.46, SD = 8.18) | 60%               | People attending various adult physical recreational and sport programs as well as members of non-physically active community organizations, and staff at secondary schools | Canada  | English? | 167 (Structural validity, internal consistency, construct validity - known groups) | Convenient?     | Not reported  |

### Facts on Aging Quiz (FAQ)

|                           |                                    |                                                                                                |                                                               |                                                                                                                                                    |    |          |                                                                                                                                                                                                                                                                                                               |                   |                                                                                     |
|---------------------------|------------------------------------|------------------------------------------------------------------------------------------------|---------------------------------------------------------------|----------------------------------------------------------------------------------------------------------------------------------------------------|----|----------|---------------------------------------------------------------------------------------------------------------------------------------------------------------------------------------------------------------------------------------------------------------------------------------------------------------|-------------------|-------------------------------------------------------------------------------------|
| (Palmore, 1977)           | FAQ                                | Not reported                                                                                   | Not reported                                                  | Graduate and undergraduate students and faculty from University campus                                                                             | US | English? | 142 (Construct validity - known groups)                                                                                                                                                                                                                                                                       | Convenient?       | Not reported                                                                        |
| (Klemmack, 1978)          | FAQ                                | (M=40.2, SD=15.3)                                                                              | 51%                                                           | Community dwellers                                                                                                                                 | US | English? | 202 (Structural validity)                                                                                                                                                                                                                                                                                     | Stratified random | Not reported                                                                        |
| (Holtzman and Beck, 1979) | FAQ                                | (M= 28.3)                                                                                      | 46%                                                           | University students, health workers                                                                                                                | US | English? | 527 (Construct validity - convergent & known-groups)                                                                                                                                                                                                                                                          | Convenient        | Not reported                                                                        |
| (Miller and Dodder, 1980) | FAQ & Miller-Dodder Revision (MDR) | (M=18.5)                                                                                       | 64%                                                           | College students                                                                                                                                   | US | English? | 430 with a sub-sample of 207 responding to FAQ and a sub-sample of 223 responding to the Miller-Dodder revised scale (Construct validity - convergent)                                                                                                                                                        | Convenient        | Not reported                                                                        |
| (Laner, 1981)             | FAQ                                | No details (50% reported to be close to 20; next largest age group reported to be close to 30) | 66% (intervention group); No details reported (control group) | Social gerontology university students (intervention group) and sociology university students not engaged in gerontological topics (control group) | US | English? | Intervention group=46 (first take of questionnaire before commencement gerontology course) and 37 (second take of questionnaire at the end of gerontology course). Control group= 43 (first take of questionnaire) and 38 (second take of questionnaire). (Construct validity - known groups, responsiveness) | Not reported      | 84% for second wave in intervention group, and 88% for second wave in control group |
| (Laner, 1981)             | FAQ                                | No details (majority close to age 20; next largest age group reported to be close to 30)       | 80% (intervention group); 50% (control group)                 | Social gerontology university students (intervention group) and sociology university students not engaged in gerontological topics (control group) | US | English? | Intervention group=30 (first take of questionnaire before commencement gerontology course) and 24 (second take of questionnaire at the end of gerontology course). Control group= 42 (first take of questionnaire) and 31 (second take of questionnaire). (Construct validity - known groups, responsiveness) | Not reported      | 80% for second wave                                                                 |

| Author                          | Specific questionnaire | Age range (M, SD)                                                                                                                              | Gender (% female)                                    | Population type                                                                                                           | Country   | Language           | N (measurement property tested)                                                                                                                                                                                                                                                                                                                                                                                                                                                         | Sampling method | Response rate |
|---------------------------------|------------------------|------------------------------------------------------------------------------------------------------------------------------------------------|------------------------------------------------------|---------------------------------------------------------------------------------------------------------------------------|-----------|--------------------|-----------------------------------------------------------------------------------------------------------------------------------------------------------------------------------------------------------------------------------------------------------------------------------------------------------------------------------------------------------------------------------------------------------------------------------------------------------------------------------------|-----------------|---------------|
| (Luszcz, 1982)                  | FAQ                    | First year students - 17 to 49 (M=22); Third year students - 19 to 55 (M= 27)                                                                  | 52% (first year students); 67% (third year students) | First year and third year university students                                                                             | Australia | English?           | 218 of which 166 (first year university students) and 52 (third year students). (Content validity only with third year university students, construct validity - known groups including both sub-samples)                                                                                                                                                                                                                                                                               | Convenient      | Not reported  |
| (Romeis and Sussman, 1982)      | FAQ                    | US - 20 to 34 (18% of sample), 35 to 49 (40% of sample), 50+ (42% of sample). Japan - 20 to 35 years (38% of sample), 35 to 49 (62% of sample) | 62% (US) 52% (Japan)                                 | US - married persons, aged 20+ from North Carolina. Japan - married persons aged 20-49 living in Tokyo                    | US, Japan | English, Japanese? | 206 (US), 591 (Japan) (Cross-cultural validity/measurement invariance)                                                                                                                                                                                                                                                                                                                                                                                                                  | Random          | Not reported  |
| (Matthews et al., 1984)         | FAQ                    | Not reported                                                                                                                                   | Not reported                                         | Undergraduates and faculty from university, health professionals                                                          | Canada    | English?           | 583 including 5 groups: first year students (258), third year students (83), third year students who had completed a course on gerontology (64), faculty (27), public health nurses (153). Samples selected to provide a comparison between students at varying levels of learning with respect to gerontology, and between students and two professional groupings, one academic and the other not. (Cross-cultural validity/measurement invariance, construct validity -known groups) | Convenient      | Not reported  |
| (Miller and Dodder, 1984)       | FAQ & MDR              | M=18.5                                                                                                                                         | 64%                                                  | Students                                                                                                                  | US        | English?           | 430 of which 207 completed FAQ and 223 MDR. (Construct validity - convergent & known groups)                                                                                                                                                                                                                                                                                                                                                                                            | Convenient      | Not reported  |
| (Courtenay and Weidemann, 1985) | FAQ 1 and 2            | Not reported                                                                                                                                   | 69%                                                  | Students enrolled in undergraduate educational psychology                                                                 | US        | English?           | 141, subdivided into four subgroups (of 34, 31, 39 and 47 participants) that were given one of two versions of the quiz, and one of two response options. (Internal consistency, construct validity - known groups)                                                                                                                                                                                                                                                                     | Convenient      | Not reported  |
| (Dail and Johnson, 1983, 1986)  | FAQ                    | Intervention group=18 to 44 (M=22.9). Control group                                                                                            | Intervention group=93%. Control group=91%            | Undergraduates in a Midwestern university. Intervention group - enrolled in a human development course, which covered old | US        | English?           | Intervention group=61, control group=61. (Construct validity - known groups, responsiveness)                                                                                                                                                                                                                                                                                                                                                                                            | Convenient      | Not reported  |

| Author                   | Specific questionnaire                         | Age range (M, SD)                           | Gender (% female) | Population type                                                                                                  | Country | Language | N (measurement property tested)                                                                                                                                                                                                                                                                                                                                                                                                                                                                   | Sampling method | Response rate                                                     |
|--------------------------|------------------------------------------------|---------------------------------------------|-------------------|------------------------------------------------------------------------------------------------------------------|---------|----------|---------------------------------------------------------------------------------------------------------------------------------------------------------------------------------------------------------------------------------------------------------------------------------------------------------------------------------------------------------------------------------------------------------------------------------------------------------------------------------------------------|-----------------|-------------------------------------------------------------------|
|                          |                                                | =18 to 39 (M=20.7)                          |                   | age; Control group - enrolled in child-development                                                               |         |          |                                                                                                                                                                                                                                                                                                                                                                                                                                                                                                   |                 |                                                                   |
| (McCutcheon, 1986)       | Psychological Facts on Aging Quiz (PFA)        | Not reported                                | 51%               | Students in psychology class                                                                                     | Canada  | English? | 121(Construct validity - known groups)                                                                                                                                                                                                                                                                                                                                                                                                                                                            | Convenient      | Not reported                                                      |
| (Donnelly et al., 1987)  | FAQ & Dye and Saddenrath Aging Quiz            | Not reported                                | Not reported      | Second year medical students, fourth year medical students, physicians in second or third year medical residency | US      | English  | Three separate groups including second year medical students (95); fourth year medical students (12); and physicians (33). (Construct validity - convergent & known groups, responsiveness)                                                                                                                                                                                                                                                                                                       | Convenient      | 15%(2nd year students), 80% (4th year students), 89% (physicians) |
| (Norris et al., 1987)    | FAQ                                            | Not reported                                | Not reported      | First and third-year Students and faculty of university, and public health nurses                                | Canada  | English? | Three separate groups including first-year students (258); third-year students (83); third-year students completing an introduction to gerontology (64); faculty (27); and public health nurses (153). Samples were selected to provide a comparison between students with varying levels of knowledge about gerontology and between these students and two professional groupings, one academic and the other not. (Structural validity, internal consistency, construct validity -known groups) | Convenient      | Not reported                                                      |
| (Kline et al., 1990)     | FAQ & Knowledge of Aging and the Elderly (KAE) | 19 to 23                                    | 50%               | College-aged adults                                                                                              | Canada  | English? | 56 with half of the sample randomly assigned to respond to FAQ and half to KAE. (Construct validity - known groups)                                                                                                                                                                                                                                                                                                                                                                               | Not reported    | Not reported                                                      |
| (Kline et al., 1990)     | FAQ & KAE                                      | Not reported                                | Not reported      | Students taking different university courses                                                                     | Canada  | English? | 95 in total with some students taking a psychology of ageing course (19), others a course on life-span personality (43), and yet others taking a non-gerontological social science course (33).(Construct validity - known groups)                                                                                                                                                                                                                                                                | Convenient      | Not reported                                                      |
| (Kline and Kline, 1991a) | FAQ                                            | 25 to 66 (M=45.3, SD=10.5)                  | 88%               | University students enrolled in gerontology program night classes                                                | Canada? | English? | 42 (Construct validity - known groups)                                                                                                                                                                                                                                                                                                                                                                                                                                                            | Convenient      | Not reported                                                      |
| (Kline and Kline, 1991b) | FAQ & KAE                                      | 17 to 45 (M=19.85, SD=4.60)                 | 63%               | Undergraduate students                                                                                           | Canada  | English? | 230 (Construct validity - convergent)                                                                                                                                                                                                                                                                                                                                                                                                                                                             | Convenient?     | 98%?                                                              |
| (O'Hanlon et al., 1993)  | FAQ & KAE                                      | Young age group=20 to 30 (M=20.3, SD=2.87). | 64%               | Adults of all ages attending four colleges in New Orleans                                                        | USA     | English? | 387, divided into three age groups including a younger age group (279), a middle-aged group (50), and an older age group (58)                                                                                                                                                                                                                                                                                                                                                                     | Convenient      | Not reported                                                      |



| Author                            | Specific questionnaire                                              | Age range (M, SD)                                                                               | Gender (% female)   | Population type                                                     | Country            | Language        | N (measurement property tested)                                                                                                                                                                                                                                                                              | Sampling method    | Response rate       |
|-----------------------------------|---------------------------------------------------------------------|-------------------------------------------------------------------------------------------------|---------------------|---------------------------------------------------------------------|--------------------|-----------------|--------------------------------------------------------------------------------------------------------------------------------------------------------------------------------------------------------------------------------------------------------------------------------------------------------------|--------------------|---------------------|
|                                   |                                                                     | <i>Middle-aged group=31 to 53 (M=38.2, SD=5.33). Old age group= 64 to 85 (M=70.03, SD=5.33)</i> |                     |                                                                     |                    |                 | <i>(Construct validity - convergent &amp; known groups)</i>                                                                                                                                                                                                                                                  |                    |                     |
| <i>(Lusk et al., 1995)</i>        | <i>FAQ 1 &amp; 2</i>                                                | <i>(M=19.7, SD=3.1)</i>                                                                         | <i>Not reported</i> | <i>Freshman nursing students</i>                                    | <i>USA</i>         | <i>English?</i> | <i>63 (Structural validity, internal consistency, construct validity - convergent &amp; known groups)</i>                                                                                                                                                                                                    | <i>Convenient</i>  | <i>Not reported</i> |
| <i>(Harris and Changas, 1994)</i> | <i>FAQ 2</i>                                                        | <i>Not reported</i>                                                                             | <i>Not reported</i> | <i>University students (sociology)</i>                              | <i>USA</i>         | <i>English?</i> | <i>375 with 195 being given a multiple choice quiz format and 180 the standard true/false response format for the quiz (Internal consistency, construct validity – convergent, known groups)</i>                                                                                                             | <i>Convenient?</i> | <i>Not reported</i> |
| <i>(Harris et al., 1996)</i>      | <i>FAQ 1</i>                                                        | <i>Not reported</i>                                                                             | <i>Not reported</i> | <i>University students (introduction to sociology)</i>              | <i>USA</i>         | <i>English?</i> | <i>230 True/False version, 271 Multiple choice version (internal consistency, measurement error, construct validity-convergent, known groups)</i>                                                                                                                                                            | <i>Convenient?</i> | <i>Not reported</i> |
| <i>(Kramer et al., 2001)</i>      | <i>FAQ (true/false format -TF, and multiple-choice format - MC)</i> | <i>Not reported</i>                                                                             | <i>Not reported</i> | <i>Health professionals, including trainees</i>                     | <i>USA</i>         | <i>English?</i> | <i>69 physicians completed the true/false response format quiz, and 32 second-year medical students completed the multiple-choice format. (Construct validity - convergent). Sub-sample of 30 from the 69 physicians (content validity)</i>                                                                  | <i>Convenient</i>  | <i>Not reported</i> |
| <i>(Pennington, 2001)</i>         | <i>FAQ 1 (TF, Don't Know format - DK)</i>                           | <i>Not reported</i>                                                                             | <i>Not reported</i> | <i>An economist and a historian</i>                                 | <i>New Zealand</i> | <i>English?</i> | <i>2 (Content validity - adaptation of quiz to New Zealand)</i>                                                                                                                                                                                                                                              | <i>Convenient?</i> | <i>Not reported</i> |
| <i>(Pennington, 2001)</i>         | <i>FAQ 1 (TF, DK)</i>                                               | <i>Not reported</i>                                                                             | <i>Not reported</i> | <i>Undergraduate, first year and third year university students</i> | <i>New Zealand</i> | <i>English?</i> | <i>218, including two sub-samples: participants who completed the true/false version (104) and participants who completed the 'don't know' version (109). (Internal consistency for each sub-sample, cross-cultural validity/measurement invariance, construct validity - convergent &amp; known groups)</i> | <i>Convenient</i>  | <i>Not reported</i> |
| <i>(Obiekwe, 2001)</i>            | <i>FAQ I &amp; II (TF &amp; MC)</i>                                 | <i>Not reported</i>                                                                             | <i>Not reported</i> | <i>Freshmen students</i>                                            | <i>USA</i>         | <i>English?</i> | <i>995, including four sub-samples: participants who completed the FAQ II TF (270), participants who completed the FAQ II MC (230), participants who completed the FAQ I TF (255) and participants who completed the FAQ I MC (240). (Structural validity, internal consistency for each</i>                 | <i>Convenient</i>  | <i>Not reported</i> |

| Author                       | Specific questionnaire              | Age range (M, SD)                                                                                          | Gender (% female) | Population type                                                                                                                     | Country        | Language | N (measurement property tested)                                                                                                                                                          | Sampling method                            | Response rate |
|------------------------------|-------------------------------------|------------------------------------------------------------------------------------------------------------|-------------------|-------------------------------------------------------------------------------------------------------------------------------------|----------------|----------|------------------------------------------------------------------------------------------------------------------------------------------------------------------------------------------|--------------------------------------------|---------------|
|                              |                                     |                                                                                                            |                   |                                                                                                                                     |                |          | <i>subsample, and construct validity - convergent across quiz formats)</i>                                                                                                               |                                            |               |
| (Seufert and Carrozza, 2002) | FAQ 1 & 2                           | Not reported                                                                                               | Not reported      | Creator of original questionnaire, Palmore                                                                                          | USA            | English? | 1 (content validity)                                                                                                                                                                     | Not reported                               | Not reported  |
| (Seufert and Carrozza, 2002) | FAQ 1 & 2                           | Not reported                                                                                               | Not reported      | Registered nurses                                                                                                                   | USA            | English? | 526 (Internal consistency, construct validity - convergent & known groups)                                                                                                               | Random                                     | 60%           |
| (Cowan et al., 2004)         | Revised Facts on Aging Quiz (R-FAQ) | Not reported                                                                                               | Not reported      | Support workers employed in UK care homes for older people                                                                          | UK             | English? | 155 (Internal consistency)                                                                                                                                                               | Convenient                                 | 75%           |
| (Runkawatt, 2007)            | FAQ                                 | Not reported                                                                                               | Not reported      | Experts in geriatrics                                                                                                               | Thailand       | Thai     | 3 (Content validity)                                                                                                                                                                     | Convenient                                 | Not reported  |
| (Runkawatt, 2007)            | FAQ                                 | Not reported                                                                                               | Not reported      | Students from public high schools (12th graders)                                                                                    | Thailand       | Thai     | 10 (Content validity - pilot test readability and understandability)                                                                                                                     | Convenient                                 | Not reported  |
| (Runkawatt, 2007)            | FAQ                                 | 16 to 19 (M=17.2, SD=0.52)                                                                                 | 60%               | Students from public high schools (12th graders)                                                                                    | Thailand       | Thai     | 428 (Structural validity, internal consistency, construct validity - convergent & known groups). A sub-sample of 38 (reliability)                                                        | Random selection of 5 classrooms out of 14 | 99%           |
| (Runkawatt, 2007)            | FAQ                                 | 17 to 18 (M=17.46, SD=0.50)                                                                                | 67%               | Students from public high schools                                                                                                   | Thailand       | Thai     | 70 (Internal consistency, reliability, construct validity - convergent & known groups)                                                                                                   | Random selection of 2 classrooms           | 95%           |
| (Unwin et al., 2008)         | FAQ 1                               | 0 to 20 (11% of sample); 20 to 40 (44% of sample); 40 to 60(8% of sample); >60 (11% of sample); other (7%) | 33%               | First year medical students at the Uniformed Services University of the Health Sciences                                             | Not reported   | English? | 428 (Construct validity - known groups)                                                                                                                                                  | Convenient?                                | 67%           |
| (Wang et al., 2010)          | FAQ 1                               | Group A - (M=28.63); Group B - (M=18.78)                                                                   | Not reported      | University student nurses including both licensed nurses with work experience and first-year undergraduates with no work experience | China (Taiwan) | Chinese  | 220, including two sub-groups: Group A - licensed nurses (125) and Group B - undergraduate nursing students (95). (Internal consistency, construct validity - convergent & known groups) | Convenient                                 | 84%           |
| (Wang et al., 2010)          | FAQ 1                               | Not reported                                                                                               | Not reported      | general geriatricians, a faculty member from the Department of Family Medicine, gerontological experts and a school administrator   | China (Taiwan) | Chinese  | 9 (Content validity)                                                                                                                                                                     | Convenient                                 | Not reported  |

| Author                               | Specific questionnaire                                 | Age range (M, SD)                                                                            | Gender (% female)                                     | Population type                                                                                             | Country                  | Language        | N (measurement property tested)                                                                                                                         | Sampling method                                            | Response rate                                       |
|--------------------------------------|--------------------------------------------------------|----------------------------------------------------------------------------------------------|-------------------------------------------------------|-------------------------------------------------------------------------------------------------------------|--------------------------|-----------------|---------------------------------------------------------------------------------------------------------------------------------------------------------|------------------------------------------------------------|-----------------------------------------------------|
| (Nakao et al., 2013)                 | Knowledge of Aging for Social Workers (version of FAQ) | 20 to 70 (M=32, SD=0.5)                                                                      | 90%                                                   | Graduate social work students from 35 schools across the country                                            | USA                      | English?        | 481 (Internal consistency, construct validity - convergent)                                                                                             | Convenient?                                                | Not reported                                        |
| (Pachana et al., 2013)               | FAQ2 -MC                                               | (M=19.9, SD= 5.1)                                                                            | 87%                                                   | First year university students                                                                              | Australia                | English?        | 151 (Cross-cultural validity/measurement invariance)                                                                                                    | Convenient                                                 | Not reported                                        |
| (Van der Elst et al., 2014)          | Revised FAQ (based on FAQ1 and FAQMH)                  | Not reported                                                                                 | Not reported                                          | Experts in geriatric and gerontology                                                                        | Belgium                  | Dutch           | 9 (Content validity)                                                                                                                                    | Convenient?                                                | Not reported                                        |
| (Van der Elst et al., 2014)          | Revised FAQ (based on FAQ1 and FAQMH)                  | 18 to 53 (M= 21.1, SD = 4.987)                                                               | 77%                                                   | First and third year nursing students                                                                       | Belgium                  | Dutch           | 1141, including first year students (801) and third year students (340). (Structural validity, internal consistency, construct validity - known groups) | Convenient                                                 | 72% of the schools and 20% of the students          |
| (Helmes, 2016)                       | FAQ2 -MC                                               | 50 to 94 (M= 70.3, SD=8.88)                                                                  | 69%                                                   | Community dwelling older adults                                                                             | Canada                   | English?        | 172 (Cross-cultural validity/Measurement invariance)                                                                                                    | Convenient                                                 | 56%                                                 |
| (Helmes and Pachana, 2016)           | FAQ2 -MC                                               | <i>Canadian sample: 50 to 94 (M=70.3, SD=8.88); Australian sample: 50 to 90 (no details)</i> | <i>Canadian sample: 69%; Australian sample: 73.8%</i> | <i>Both Canadian and Australian samples: Community dwelling older adults; 50+ for the Australian sample</i> | <i>Canada; Australia</i> | <i>English?</i> | <i>Canadian sample: 172; Australian sample: 195 (Internal consistency, construct validity - convergent)</i>                                             | <i>Convenient for both Canadian and Australian samples</i> | <i>Canadian sample: 56%; Australian sample: 95%</i> |
| (Shiovitz-Ezra et al., 2016)         | FAQ1                                                   | (M=46, SD=1.6)                                                                               | Approx. 50%                                           | Community dwellers, >21, Jewish, and Hebrew speakers                                                        | Israel                   | Hebrew          | 92 (Structural validity, internal consistency, construct validity - convergent & known groups)                                                          | Probability sampling                                       | 52%                                                 |
| <b>Fraboni Scale of Ageism (FSA)</b> |                                                        |                                                                                              |                                                       |                                                                                                             |                          |                 |                                                                                                                                                         |                                                            |                                                     |
| (Fraboni et al., 1990)               | FSA                                                    | 16 to 65 (M=31.19)                                                                           | 65%                                                   | University students, hospital personnel, small businesses, health and education settings                    | Canada?                  | English?        | 231 (Structural validity, internal consistency, construct validity-convergent and known-groups)                                                         | Purposive sampling                                         | 98% of students; 82% of others                      |
| (Fraboni et al., 1990)               | FSA                                                    | Not reported                                                                                 | 50%                                                   | High school students                                                                                        | Canada?                  | English?        | 120 (Content validity- pilot test)                                                                                                                      | Convenient?                                                | Not reported                                        |
| (Fraboni et al., 1990)               | FSA                                                    | Not reported                                                                                 | Not reported                                          | Psychometrics and clinical psychologists                                                                    | Canada?                  | English?        | 9 (Content validity)                                                                                                                                    | Convenient?                                                | Not reported                                        |
| (Rupp et al., 2005)                  | FSA                                                    | (M=22.6)                                                                                     | 70%                                                   | Undergraduates in a public university                                                                       | USA                      | English?        | 353 (Structural validity, internal consistency, construct validity-convergent and known-groups)                                                         | Convenient                                                 | Not reported                                        |
| (Rupp et al., 2005)                  | FSA                                                    | (M=22.1)                                                                                     | 71%                                                   | Undergraduates in a public university                                                                       | USA                      | English?        | 201 (Structural validity)                                                                                                                               | Convenient                                                 | Not reported                                        |

| Author                       | Specific questionnaire | Age range (M, SD)                                                                       | Gender (% female)                            | Population type                                                                                                      | Country            | Language | N (measurement property tested)                                                                                  | Sampling method      | Response rate                                |
|------------------------------|------------------------|-----------------------------------------------------------------------------------------|----------------------------------------------|----------------------------------------------------------------------------------------------------------------------|--------------------|----------|------------------------------------------------------------------------------------------------------------------|----------------------|----------------------------------------------|
| (Bodner and Lazar, 2008)     | FSA                    | (M=27.9, SD=7.3)                                                                        | 54%                                          | University students                                                                                                  | Israel             | Hebrew?  | 491 (Structural validity, internal consistency, construct validity - known groups)                               | Convenient           | Not reported                                 |
| (Boudjemad and Gana, 2009)   | FSA                    | Not reported                                                                            | Not reported                                 | Bilingual experts knowledgeable of psychology                                                                        | France?            | French   | 5 (Content validity - adaptation of questionnaire to French)                                                     | Not reported         | Not reported                                 |
| (Boudjemad and Gana, 2009)   | FSA                    | (M=24.33, SD=8.52)                                                                      | Not reported                                 | Not reported                                                                                                         | France?            | French   | 30 (Content validity - pilot French translation of original English questionnaire to assess comprehensibility)   | Convenient?          | Not reported                                 |
| (Boudjemad and Gana, 2009)   | FSA                    | (M=23.17, SD=6.25)                                                                      | Not reported                                 | Bilingual students                                                                                                   | France?            | French   | 32 (Cross-cultural validity/measurement invariance)                                                              | Convenient?          | Not reported                                 |
| (Boudjemad and Gana, 2009)   | FSA                    | (M=23.31, SD=7.68)                                                                      | 63%                                          | University students                                                                                                  | France?            | French   | 323 (Structural validity, internal consistency, construct validity - convergent). Sub-sample of 32 (reliability) | Convenient           | Close to 60%                                 |
| (Boudjemad and Gana, 2009)   | FSA                    | 17 to 74 (M=30.25, SD=13.58)                                                            | 65%                                          | University students and older adults                                                                                 | France?            | French   | 284 (Structural validity, construct validity - known groups)                                                     | Convenient           | Close to 75%                                 |
| (Lin et al., 2010)           | FSA                    | 17 to 35 (M=19.69, SD=2.99)                                                             | 74%                                          | First year psychology Anglo-Australian and Asian university students who had been in Australia for less than 5 years | Australia          | English  | 65 (Internal consistency, cross-cultural validity/measurement invariance, construct validity - convergent)       | Convenient           | Not reported                                 |
| (Kutlu et al., 2012)         | FSA                    | (M=33.21, SD=13.41)                                                                     | 72%                                          | Students in schools and family members                                                                               | Turkey             | Turkish  | 231 (Structural validity, internal consistency, construct validity - known groups)                               | Convenient           | 77%                                          |
| (Kutlu et al., 2012)         | FSA                    | Not reported                                                                            | Not reported                                 | Nurse academicians                                                                                                   | Turkey             | Turkish  | 12 (Content validity)                                                                                            | Convenient           | Not reported                                 |
| (Kutlu et al., 2012)         | FSA                    | Not reported                                                                            | Not reported                                 | Not reported                                                                                                         | Turkey             | Turkish  | 30 (Content validity - pilot study)                                                                              | Convenient           | Not reported                                 |
| (Helmes and Pachana, 2016)   | FSA                    | Canadian sample: 50 to 94 (M=70.3, SD=8.88). Australian sample: 50 to 90 (not reported) | Canadian sample: 69%. Australian sample: 74% | Both Canadian and Australian samples: Community dwelling older adults,                                               | Canada & Australia | English? | Canadian sample: 172 Australian sample: 195 (Internal consistency, construct validity - convergent)              | Convenient           | Canadian sample: 56%; Australian sample: 95% |
| (Shiovitz-Ezra et al., 2016) | FSA                    | (M=46, SD=1.6)                                                                          | Approx. 50%                                  | Community dwellers, >21, Jewish, and Hebrew speakers                                                                 | Israel             | Hebrew   | 92 (Structural validity, internal consistency, construct validity - convergent and known groups)                 | Probability sampling | 52%                                          |

| Author                                                   | Specific questionnaire    | Age range (M, SD)                                  | Gender (% female)          | Population type                                                       | Country      | Language     | N (measurement property tested)                                                                                                                                                                                                     | Sampling method                         | Response rate |
|----------------------------------------------------------|---------------------------|----------------------------------------------------|----------------------------|-----------------------------------------------------------------------|--------------|--------------|-------------------------------------------------------------------------------------------------------------------------------------------------------------------------------------------------------------------------------------|-----------------------------------------|---------------|
| <b>Image of Aging Scale (IAS)</b>                        |                           |                                                    |                            |                                                                       |              |              |                                                                                                                                                                                                                                     |                                         |               |
| (Levy et al., 2004)                                      | IAS                       | Not reported                                       | 64%                        | Community dwellers >70 years of age                                   | USA          | English?     | 717 (Content validity-secondary analysis)                                                                                                                                                                                           | Convenient?                             | 95%           |
| (Levy et al., 2004)                                      | IAS                       | Not reported                                       | 50%                        | >70 years                                                             | USA          | English?     | 10 (Content validity)                                                                                                                                                                                                               | Convenient                              | Not reported  |
| (Levy et al., 2004)                                      | IAS                       | Not reported                                       | 60%                        | >65 years                                                             | USA          | English?     | 10 (Content validity)                                                                                                                                                                                                               | Convenient                              | Not reported  |
| (Levy et al., 2004)                                      | IAS                       | Not reported                                       | Not reported               | Experts in gerontology                                                | USA          | English?     | 5 (Content validity)                                                                                                                                                                                                                | Convenient                              | Not reported  |
| (Levy et al., 2004)                                      | IAS                       | Not reported                                       | Not reported               | Not reported                                                          | Not reported | Not reported | Not reported (Content validity -pilot test)                                                                                                                                                                                         | Convenient?                             | Not reported  |
| (Levy et al., 2004)                                      | IAS                       | (M=66.4, SD=10.9)                                  | 40%                        | Not reported                                                          | USA          | English?     | 20 (Reliability)                                                                                                                                                                                                                    | Convenient                              | Not reported  |
| (Levy et al., 2004)                                      | IAS                       | (M=69.1, SD=12.0)                                  | 44%                        | Not reported                                                          | USA          | English?     | 68 (Internal consistency, construct validity - convergent)                                                                                                                                                                          | Convenient                              | Not reported  |
| (Levy et al., 2004)                                      | IAS                       | (M=73.0, SD=8.7)                                   | Not reported               | Older adults                                                          | USA          | English?     | 76 (Construct validity - known groups)                                                                                                                                                                                              | Convenient                              | Not reported  |
| (Bai et al., 2012)                                       | Self-Image of Aging Scale | Not reported                                       | Not reported               | Older adults (15 from urban and 15 from rural areas)                  | China        | Chinese      | 30 (Content validity)                                                                                                                                                                                                               | Not reported                            | Not reported  |
| (Bai et al., 2012)                                       | Self-Image of Aging Scale | Not reported                                       | Not reported               | Older adults                                                          | China        | Chinese      | 20 (Content validity)                                                                                                                                                                                                               | Not reported                            | Not reported  |
| (Bai et al., 2012)                                       | Self-Image of Aging Scale | 60 to 69 (60%), 70 to 79 (28.5%), 80 to 89 (11.5%) | 50%                        | Community dwelling older adults                                       | China        | Chinese      | 445 (Structural validity, internal consistency, cross-cultural validity/measurement invariance, reliability, construct validity- convergent)                                                                                        | Multistage sampling with stratification | 89%           |
| (Fernández-Ballesteros et al., 2017)                     | IAS                       | 18+ (M=46.98, SD=18.08)                            | 51% and 54% for sub-sample | Community dwellers                                                    | Spain        | Spanish      | 1,105 randomly divided into two groups of 552 and 553 participants. (Structural validity, internal consistency, cross-cultural validity/measurement invariance). And sub-sample aged 50+ (n=448) (construct validity - convergent). | Random                                  | Not reported  |
| (Fernández-Ballesteros et al., 2017)                     | IAS                       | (M=43.5, SD=10.18)                                 | 49%                        | Volunteer members of the Spanish Assoc. of Geriatrics and Gerontology | Spain        | Spanish      | 325 (Structural validity, internal consistency, cross-cultural validity/measurement invariance)                                                                                                                                     | Convenient                              | Not reported  |
| <b>Kogan's Attitudes towards Old People Scale (KAOP)</b> |                           |                                                    |                            |                                                                       |              |              |                                                                                                                                                                                                                                     |                                         |               |
| (Kogan, 1961)                                            | KAOP                      | Not reported                                       | Not reported               | Experts                                                               | USA          | English?     | Not reported (Content validity - Scale development)                                                                                                                                                                                 | Not reported                            | Not reported  |

| Author                    | Specific questionnaire | Age range (M, SD)                              | Gender (% female) | Population type                                                                           | Country  | Language | N (measurement property tested)                                                                                                                     | Sampling method                                                      | Response rate |
|---------------------------|------------------------|------------------------------------------------|-------------------|-------------------------------------------------------------------------------------------|----------|----------|-----------------------------------------------------------------------------------------------------------------------------------------------------|----------------------------------------------------------------------|---------------|
| (Kogan, 1961)             | KAOP                   | Not reported                                   | 17%               | Introductory university class in psychology                                               | USA      | English? | 482 (Internal consistency, construct validity - convergent & known groups)                                                                          | Convenient                                                           | Not reported  |
| (Hicks et al., 1976)      | KAOP                   | Not reported                                   | Not reported      | University students, undergraduate                                                        | USA      | English? | 69 (Reliability, construct validity - convergent)                                                                                                   | Random                                                               | Not reported  |
| (Wingard, 1980)           | KAOP                   | Not reported                                   | Not reported      | University students                                                                       | USA      | English? | 69 (Structural validity, reliability, construct validity - convergent)                                                                              | Not reported                                                         | Not reported  |
| (Hilt, 1997)              | Revised-KAOP           | (M=29)                                         | 59.30%            | Local news producers                                                                      | USA      | English? | 87 (Internal consistency, criterion validity)                                                                                                       | Probability sampling: market size used in a stratified random sample | 41%           |
| (Söderhamn et al., 2000)  | KAOP                   | 18 to 24 (32%);<br>25 to 49 (59%);<br>50+ (9%) | 94%               | University students, nurses and other caregivers working in care homes or local hospitals | Sweden   | Swedish  | 319 (Structural validity, internal consistency, construct validity - known groups)                                                                  | Convenient                                                           | 100%          |
| (Lambrinou et al., 2005)  | KAOP                   | Not reported                                   | Not reported      | Experts in nursing education                                                              | Greece   | Greek    | 4 (Content validity - questionnaire adaptation to Greek context)                                                                                    | Convenient                                                           | Not reported  |
| (Lambrinou et al., 2005)  | KAOP                   | 17 to 48,<br>(M=21)                            | 83%               | First and third year nursing students in two universities                                 | Greece   | Greek    | 390 including first year students (121) and final year students (78) (Structural validity, internal consistency, construct validity - known groups) | Convenient?                                                          | 100%          |
| (Ogiwara et al., 2007)    | KAOP                   | Not reported                                   | 56.10%            | Physiotherapists working in hospitals, clinics, nursing homes                             | Japan    | Japanese | 181 (Structural validity, internal consistency, construct validity - convergent)                                                                    | Convenient                                                           | 57%           |
| (Runkawatt, 2007)         | KAOP                   | Not reported                                   | Not reported      | Experts in geriatrics                                                                     | Thailand | Thai     | 3 (Content validity)                                                                                                                                | Convenient                                                           | Not reported  |
| (Runkawatt, 2007)         | KAOP                   | 12th grade high school students                | Not reported      | Students from public high schools (12th graders)                                          | Thailand | Thai     | 10 (Content validity - pilot test readability and understandability)                                                                                | Convenient                                                           | Not reported  |
| (Runkawatt, 2007)         | KAOP                   | 16 to 19<br>(M=17.2,<br>SD=0.52)               | 60%               | Students from public high schools (12th graders)                                          | Thailand | Thai     | 428 (Structural validity, internal consistency, construct validity - convergent & known groups). Of these 38 (reliability)                          | Random selection of 5 classrooms out of 14                           | 99%           |
| (Runkawatt, 2007)         | KAOP                   | 17 to 18<br>(M=17.46,<br>SD=0.50)              | 67%               | Students from public high schools                                                         | Thailand | Thai     | 70 (Internal consistency, reliability, construct validity - convergent & known groups)                                                              | Random selection of 2 classrooms                                     | 95%           |
| (Iwasaki and Jones, 2008) | KAOP                   | (M=21.6,<br>SD=3.8)                            | 54%               | Undergraduate college students enrolled in counseling psychology                          | USA      | English? | 512 (Internal consistency, construct validity - convergent)                                                                                         | Convenient                                                           | Not reported  |

| Author                      | Specific questionnaire | Age range (M, SD)                                | Gender (% female)                            | Population type                                                                                                                                                                                                                | Country        | Language | N (measurement property tested)                                                                                                                                              | Sampling method | Response rate |
|-----------------------------|------------------------|--------------------------------------------------|----------------------------------------------|--------------------------------------------------------------------------------------------------------------------------------------------------------------------------------------------------------------------------------|----------------|----------|------------------------------------------------------------------------------------------------------------------------------------------------------------------------------|-----------------|---------------|
| (Helmes and Campbell, 2009) | KAOP                   | (M=24.3, SD=8.5)                                 | 68%                                          | Undergraduate university students                                                                                                                                                                                              | Australia      | English? | 60 (Internal consistency, construct validity - known groups)                                                                                                                 | Convenient      | Unclear       |
| (Yen et al., 2009)          | KAOP                   | Not reported                                     | Not reported                                 | Experts, including general geriatricians, a faculty member from the Department of Family Medicine, gerontological experts and a school administrator                                                                           | China (Taiwan) | Chinese  | 9 (Content validity)                                                                                                                                                         | Not reported    | Not reported  |
| (Yen et al., 2009)          | KAOP                   | Not reported                                     | 49%                                          | Medical and nursing undergraduates at a central Taiwan Medical University                                                                                                                                                      | China (Taiwan) | Chinese  | 275 (Structural validity, internal consistency, reliability)                                                                                                                 | Convenient      | 88.40%        |
| (Erdemir et al., 2011)      | KAOP                   | Not reported                                     | Not reported                                 | Experts including a geriatrician, family physician, sociologist, faculty members from social work, dietetics, sports, health management, physical therapy, psychology, communication, nursing departments and a clinical nurse | Turkey         | Turkish  | 12 (Content validity)                                                                                                                                                        | Convenient?     | Not reported  |
| (Erdemir et al., 2011)      | KAOP                   | Not reported                                     | Not reported                                 | Students                                                                                                                                                                                                                       | Turkey         | Turkish  | 30 (Content validity - pilot test)                                                                                                                                           | Convenient?     | Not reported  |
| (Erdemir et al., 2011)      | KAOP                   | 18 to 27 (M=21.76, SD=1.72)                      | 81%                                          | Undergraduate university students who provide health care to the elderly in the future                                                                                                                                         | Turkey         | Turkish  | 594 (Structural validity, internal consistency). And a subsample of 402 (reliability)                                                                                        | Not reported    | 71%           |
| (Küçükgüçlü et al., 2011)   | KAOP                   | Not reported                                     | Not reported                                 | Experts including a family physician, a faculty member from the Department of Neurology, clinical nurses, and faculty members from the School of Nursing                                                                       | Turkey         | Turkish  | 7 (Content validity)                                                                                                                                                         | Convenient?     | Not reported  |
| (Küçükgüçlü et al., 2011)   | KAOP                   | Not reported                                     | Not reported                                 | Nursing students                                                                                                                                                                                                               | Turkey         | Turkish  | 30 (Content validity - pilot test)                                                                                                                                           | Convenient?     | Not reported  |
| (Küçükgüçlü et al., 2011)   | KAOP                   | 18 to 26 (M=20.08, SD=1.6)                       | 82.30%                                       | University students                                                                                                                                                                                                            | Turkey         | Turkish  | 237 (Structural validity, internal consistency, reliability)                                                                                                                 | Convenient      | Not reported  |
| (Kiliç and Adibelli, 2011)  | KAOP                   | Working nurses group (M=27.36, SD=4.54); Nursing | Working nurses group (Not reported); Nursing | Third and fourth year university nursing students and hospital nurses                                                                                                                                                          | Turkey         | Turkish  | 263, including university students (145) and working nurses (118). (Structural validity, internal consistency, reliability, construct validity - convergent & known groups). | Convenient      | Not reported  |

| Author                       | Specific questionnaire | Age range (M, SD)                 | Gender (% female)     | Population type                                                                                                                                        | Country | Language | N (measurement property tested)                                                                                     | Sampling method | Response rate |
|------------------------------|------------------------|-----------------------------------|-----------------------|--------------------------------------------------------------------------------------------------------------------------------------------------------|---------|----------|---------------------------------------------------------------------------------------------------------------------|-----------------|---------------|
|                              |                        | students group (M=20.17, SD=1.40) | students group (100%) |                                                                                                                                                        |         |          |                                                                                                                     |                 |               |
| (Rejeh et al., 2012)         | KAOP                   | Not reported                      | Not reported          | Experts including a geriatrician, sociologist, faculty members from nursing, health management, psychology and nursing departments and clinical nurses | Iran    | Persian  | 20 (Content validity)                                                                                               | Convenient?     | Not reported  |
| (Rejeh et al., 2012)         | KAOP                   | Not reported                      | Not reported          | Nursing students                                                                                                                                       | Iran    | Persian  | 20 (Content validity - pilot test)                                                                                  | Convenient?     | Not reported  |
| (Rejeh et al., 2012)         | KAOP                   | (M=31.01, SD=5.96)                | 71%                   | Nurses working in five different teaching hospitals                                                                                                    | Iran    | Persian  | 350 (Structural validity, internal consistency, construct validity - known groups). A subsample of 70 (reliability) | Non-random      | 97%           |
| (Matarese et al., 2013)      | KAOP                   | Not reported                      | Not reported          | Experts including geriatric physicians, nurses, and psychologists                                                                                      | Italy   | Italian  | 11 (Content validity)                                                                                               | Not reported    | Not reported  |
| (Matarese et al., 2013)      | KAOP                   | 18 to 54 (M=25, SD=5.9)           | 69%                   | Nursing students attending one of two universities in Rome                                                                                             | Italy   | Italian  | 1637 (Structural validity, internal consistency)                                                                    | Convenient      | 73%           |
| (Vitman-Schorr et al., 2014) | KAOP                   | (M=32.57, SD=10.73)               | 59%                   | Community dwellers aged 18 to 64 years, living in Tel Aviv                                                                                             | Israel  | Hebrew   | 300 (Structural validity, internal consistency)                                                                     | Convenient      | Not reported  |

| Reactions to Aging Questionnaire (RAQ) |     |              |              |                                                                                                                                    |           |          |                                                                                                 |              |              |
|----------------------------------------|-----|--------------|--------------|------------------------------------------------------------------------------------------------------------------------------------|-----------|----------|-------------------------------------------------------------------------------------------------|--------------|--------------|
| (Gething, 1994)                        | RAQ | Not reported | Not reported | Nurses undertaking post basic education at University                                                                              | Australia | English? | 60 (Content validity)                                                                           | Not reported | Not reported |
| (Gething, 1994)                        | RAQ | Not reported | Not reported | 300 nurses working at acute care hospital (n = 157), community (n = 79) and nursing homes (n = 64); 150 from the general community | Australia | English? | 450 (Internal consistency)                                                                      | Purposive    | Not reported |
| (Gething, 1994)                        | RAQ | Not reported | Not reported | Registered nurses at a hospital                                                                                                    | Australia | English? | 100 (Structural validity)                                                                       | Not reported | Not reported |
| (Gething, 1994)                        | RAQ | 20 to 69     | 88%          | Health professionals including health promotion workers, nurses, psychologists, social workers, doctors and physiotherapists       | Australia | English? | 531 (Structural validity, internal consistency, construct validity – convergent & known groups) | Purposive    | Not reported |



| Author                     | Specific questionnaire | Age range (M, SD)                                                                                   | Gender (% female)                                      | Population type                                                                                                                                                     | Country                                                               | Language         | N (measurement property tested)                                                                                                                          | Sampling method                                                     | Response rate                                |
|----------------------------|------------------------|-----------------------------------------------------------------------------------------------------|--------------------------------------------------------|---------------------------------------------------------------------------------------------------------------------------------------------------------------------|-----------------------------------------------------------------------|------------------|----------------------------------------------------------------------------------------------------------------------------------------------------------|---------------------------------------------------------------------|----------------------------------------------|
| (Netz et al., 2001)        | RAQ                    | 45 to 55                                                                                            | 100%                                                   | Australian born women aged 45 to 55 participating in the Melbourne Women's Midlife Health Project                                                                   | Australia                                                             | English?         | 381 (Content validity, structural validity, internal consistency)                                                                                        | Random digit telephone dialing                                      | 56% at baseline, of which 86% returned RAQ   |
| (Getting et al., 2002)     | RAQ                    | Reported per age group per country                                                                  | Australia: 88.4%, UK: 93.1%                            | People who worked in a nursing profession, particularly gerontology                                                                                                 | Australia, UK                                                         | English?         | Australia: 147, United Kingdom: 218 (Construct validity – convergent & known groups)                                                                     | A proforma developed to maximize uniformity between the 2 countries | 70% across the two countries                 |
| (Gething et al., 2004)     | RAQ                    | Reported per age group per country                                                                  | Australia: 88.4%, United Kingdom: 93.1%, Sweden: 86.3% | People who worked in different nursing specialties including community health, orthopedic, intensive care, emergency, oncology. The majority worked in gerontology. | Australia, Sweden, UK (Australia and UK- same sample as Getting 2002) | English, Swedish | Australia: 147, United Kingdom: 218, Sweden: 102 (Structural validity, internal consistency, cross-cultural validity, construct validity - known groups) | Convenient                                                          | Average of 78% across 3 countries            |
| (Helmes and Pachana, 2016) | RAQ                    | Canadian sample: 50 to 94 years (M=70.3, SD=8.88); Australian sample: 50 to 90 years (Not reported) | Canadian sample: 69%; Australian sample: 73.8%         | Both Canadian and Australian samples: Community dwelling older adults, 50+ for the Australian sample                                                                | Canada; Australia                                                     | English?         | Canadian sample: 172; Australian sample: 195 (Internal consistency, construct validity - convergent)                                                     | Convenient for both Canadian and Australian samples                 | Canadian sample: 56%; Australian sample: 95% |

**Tuckman and Lorge Questionnaire (TLQ)**

|                               |                                                                    |                           |        |                                                                           |     |          |                                                       |              |              |
|-------------------------------|--------------------------------------------------------------------|---------------------------|--------|---------------------------------------------------------------------------|-----|----------|-------------------------------------------------------|--------------|--------------|
| (Tuckman and Lorge, 1954)     | TLQ-% responses                                                    | 21 to 51 (M=32.4, SD=7.3) | 38.30% | Graduate students attending a summer class on the psychology of the adult | USA | English  | 47 (Construct validity - convergent, responsiveness)  | Convenient   | Not reported |
| (Tuckman and Lorge, 1954)     | TLQ -Yes/No responses                                              | Not reported              | 35.5%  | Class in the psychology of the adult during the regular academic year     | USA | English  | 124 (Construct validity - convergent, responsiveness) | Convenient   | Not reported |
| (Axelrod and Eisdorfer, 1961) | TLQ                                                                | Reported per subgroup     | 38%    | Students attending an introductory psychology university course           | USA | English? | 280 (Construct validity - known groups)               | Not reported | Not reported |
| (Eisdorfer, 1966)             | TLQ -88 most valid items as found in (Axelrod and Eisdorfer, 1961) | 16 to 23 (M=18.8)         | 38.5%  | Introductory psychology course                                            | USA | English? | 182 (Construct validity - known groups)               | Convenient?  | Not reported |

| <b>Author</b>                      | <b>Specific questionnaire</b>                                                           | <b>Age range (M, SD)</b> | <b>Gender (% female)</b> | <b>Population type</b>                    | <b>Country</b>   | <b>Language</b> | <b>N (measurement property tested)</b>                                                                                                                                                                                            | <b>Sampling method</b> | <b>Response rate</b>                                   |
|------------------------------------|-----------------------------------------------------------------------------------------|--------------------------|--------------------------|-------------------------------------------|------------------|-----------------|-----------------------------------------------------------------------------------------------------------------------------------------------------------------------------------------------------------------------------------|------------------------|--------------------------------------------------------|
| <i>(Eisdorfer, 1966)</i>           | <i>TLQ -137 original (Tuckman and Lorge, 1953)</i>                                      | <i>16 to 23 (M=19.2)</i> | <i>44.2%</i>             | <i>College students</i>                   | <i>USA</i>       | <i>English?</i> | <i>147 (Construct validity - known groups)</i>                                                                                                                                                                                    | <i>Convenient?</i>     | <i>Not reported</i>                                    |
| <i>(Hicks et al., 1976)</i>        | <i>Tuckman-Lorge Attitude Scale (modified version by (Axelrod and Eisdorfer, 1961))</i> | <i>Not reported</i>      | <i>Not reported</i>      | <i>university students, undergraduate</i> | <i>USA</i>       | <i>English?</i> | <i>69 undergraduate students (35 in introductory developmental psychology and 34 in adult development and aging) (Construct validity - convergent). A subsample of 32 of those not enrolled in the ageing class (Reliability)</i> | <i>Random</i>          | <i>Not reported</i>                                    |
| <i>(Wingard, 1980)</i>             | <i>Tuckman-Lorge Attitude Scale(modified version by (Axelrod and Eisdorfer, 1961))</i>  | <i>Not reported</i>      | <i>Not reported</i>      | <i>University students</i>                | <i>USA</i>       | <i>English?</i> | <i>69 (secondary data analysis) (Structural validity, reliability, construct validity - convergent)</i>                                                                                                                           | <i>Not reported</i>    | <i>Not reported</i>                                    |
| <i>(Helmes and Campbell, 2009)</i> | <i>TLQ (1952)</i>                                                                       | <i>24.3(8.5)</i>         | <i>68%</i>               | <i>University undergraduate</i>           | <i>Australia</i> | <i>English?</i> | <i>60 (Internal consistency, construct validity - known groups)</i>                                                                                                                                                               | <i>Convenient</i>      | <i>90 volunteered, 30 excluded due to missing data</i> |

Italics are used to signal articles that assessed more than one scale

? indicates that the entry was implicitly reflected in the record. For example, 'English?' indicates that the authors of this article interpreted that this was the language used in the record based on the information provided in the record.

**Supplementary Table 2**  
**Characteristics of the different ageism scales**

| Author                                       | Specific questionnaire                           | Form of administration (e.g. Self or other administered, online or face-to-face)                                       | Subscale/s # of items                                                                                                                                                                                                                                           | Response options                                                                                                                                       | Range of scores/scoring                                                            | Original language | Available translation |
|----------------------------------------------|--------------------------------------------------|------------------------------------------------------------------------------------------------------------------------|-----------------------------------------------------------------------------------------------------------------------------------------------------------------------------------------------------------------------------------------------------------------|--------------------------------------------------------------------------------------------------------------------------------------------------------|------------------------------------------------------------------------------------|-------------------|-----------------------|
| <b>Aging Perceptions Questionnaire (APQ)</b> |                                                  |                                                                                                                        |                                                                                                                                                                                                                                                                 |                                                                                                                                                        |                                                                                    |                   |                       |
| (Barker et al., 2007)                        | APQ                                              | Not reported                                                                                                           | 35 items, including 7 subscales (timeline chronic, timeline cyclical, consequence positive, consequence negative, emotional representations, control positive and control negative). 3 items were removed after validation. Also included an identity sub-scale | 5-point Likert scale from 1 (strongly disagree) to 5-(strongly agree) for all subscales except for the identity which had a yes/no response format     | 0-17 range per subscale except for the identity sub-scale, which had a 0-100 range | English?          | Not reported          |
| (Ingrand et al., 2012)                       | APQ                                              | Self-administered, paper and pencil. In case of difficulty in reading or writing responses, a third party could assist | 32 items, including 7 sub-scales, each comprising 3 to 5 items (timeline chronic, timeline cyclical, consequence positive, consequence negative, emotional representations, control positive, and control negative)                                             | 5-point Likert scale ranging from 1 (strongly disagree) to 5 (strongly agree). For the negative control dimension only, the response scale is reversed | 1 to 5 per dimension                                                               | English / Irish?  | French                |
| (Sexton et al., 2014)                        | APQ                                              | Computer assisted home interview                                                                                       | 32 items, including 7 sub-scales                                                                                                                                                                                                                                | 5-point Likert scale ranging from 1 (strongly agree) to 5 (strongly disagree)                                                                          | Not reported                                                                       | English?          | Not reported          |
| (Sexton et al., 2014)                        | Brief Ageing Perceptions Questionnaire (B-APQ)   | Self-administered? paper and pencil?                                                                                   | 17 items, including 5 sub-scales                                                                                                                                                                                                                                | 5-point Likert scale ranging from 1 (strongly agree) to 5 (strongly disagree)                                                                          | Not reported                                                                       | English?          | Not reported          |
| (Slotman et al., 2015)                       | APQ                                              | Self-administered, paper and pencil                                                                                    | 32 items, including 7 sub-scales (timeline chronic, timeline cyclical, consequence positive, consequence negative, emotional representations, control positive and control negative)                                                                            | 5-point Likert scale ranging from 1 (strongly agree) to 5 (strongly disagree). The response scale of the control negative dimension is reversed        | Not reported                                                                       | English           | Dutch                 |
| (Slotman et al., 2015)                       | Aging Perceptions Questionnaire -Short (APQ - S) | Self-administered, paper and pencil                                                                                    | 21 items from the original 32, including the 7 original sub-scales (timeline chronic, timeline cyclical, consequence positive, consequence negative, emotional representations, control positive and control negative)                                          | 5-point Likert scale ranging from 1 (strongly agree) to 5 (strongly disagree). The response scale of the control negative dimension is reversed        | Not reported                                                                       | English           | Dutch                 |
| (Slotman et al., 2015)                       | B - APQ                                          | Self-administered, paper and pencil                                                                                    | 17 items, including 5 sub-scales (timeline chronic, consequence positive, control positive, emotional representations and the combined consequence and control negative dimension)                                                                              | Control negative dimensions are not reverse coded                                                                                                      | Not reported                                                                       | English           | Dutch                 |
| (Chen et al., 2016)                          | APQ                                              | Self-administered? paper and pencil?                                                                                   | 49 items, including 8 sub-scales (timeline acute/chronic and cyclical, consequences positive and negative, control positive and negative, emotional representations, identity).                                                                                 | 5-point Likert scale from 1 (completely disagree) to 5 (completely agree) for all sub-scales except identity. Certain items are reverse coded          | Not reported                                                                       | English           | Chinese               |

| Author                  | Specific questionnaire | Form of administration (e.g. Self or other administered, online or face-to-face)                                                          | Subscale/s # of items                                                                                                                                                                                         | Response options                                                                                                                                                                                                                      | Range of scores/scoring | Original language | Available translation |
|-------------------------|------------------------|-------------------------------------------------------------------------------------------------------------------------------------------|---------------------------------------------------------------------------------------------------------------------------------------------------------------------------------------------------------------|---------------------------------------------------------------------------------------------------------------------------------------------------------------------------------------------------------------------------------------|-------------------------|-------------------|-----------------------|
| (Moghadam et al., 2016) | B-APQ                  | Self-administered, paper and pencil. For illiterate participants, the questionnaire was read and their answers recorded by the researcher | 17 items including 5 subscales                                                                                                                                                                                | Nor reported                                                                                                                                                                                                                          | Not reported            | English           | Persian               |
| (Slotman et al., 2017)  | APQ - S                | Self-administered, paper and pencil                                                                                                       | 2 items, including 7 sub-scales, each comprised of three items (timeline - cyclical and chronic/acute, consequence both positive and negative, control both positive and negative, emotional representations) | 5-point Likert scale ranging from 1 (totally disagree) to 5 (totally agree). The scale for control negative items is reversed, and responses were recoded so that higher scores were indicative of greater perceived negative control | Not reported            | Dutch             | Turkish               |

#### Aging Semantic Differential Test (ASD)

|                                |                                                                       |                                      |                                                                                                                                                                                                                                                             |                                                                                                                                                                                             |                                                                           |              |              |
|--------------------------------|-----------------------------------------------------------------------|--------------------------------------|-------------------------------------------------------------------------------------------------------------------------------------------------------------------------------------------------------------------------------------------------------------|---------------------------------------------------------------------------------------------------------------------------------------------------------------------------------------------|---------------------------------------------------------------------------|--------------|--------------|
| (Rosencranz and McNevin, 1969) | ASD                                                                   | Self-administered paper and pencil   | 32 items grouped into 3 dimensions (Instrumental-Ineffective, Autonomous-Dependent, Personal Acceptability). 3 target objects in the scale: a male between the ages of 20-30, a male between the ages of 40-55, and a male 70-85 years of age judged on the | 7-point Likert scale                                                                                                                                                                        | Mean scores per dimension and object assessed; in this study 2.12-5.62    | English      | Not reported |
| (Underwood et al., 1985)       | ASD                                                                   | Self-administered paper and pencil   | 32 items and two 2 target objects: old person, young person                                                                                                                                                                                                 | 7-point Likert scale                                                                                                                                                                        | Not reported                                                              | English?     | Not reported |
| (Gekoski et al., 1991)         | ASD                                                                   | Not reported                         | 32 items 3 target objects: the average man or woman in mid-20s, mid-40s, early 70s                                                                                                                                                                          | 7-point Likert scale                                                                                                                                                                        | Not reported                                                              | English?     | Not reported |
| (O'Hanlon et al., 1993)        | ASD                                                                   | Self-administered? Paper and pencil? | 32-bipolar-adjectives, grouped into 3 sub-scales (Instrumental-Ineffective; Autonomous-Dependent; Acceptability-Unacceptability)                                                                                                                            | 7-point Likert scale for each item                                                                                                                                                          | Not reported                                                              | Not reported | Not reported |
| (Intrieri et al., 1995)        | ASD                                                                   | Self-administered, paper and pencil  | 32 pairs of bipolar adjectives, grouped into a 3-factor structure (Instrumental-Ineffective; Autonomous-Dependent; Acceptability-Unacceptability).                                                                                                          | 7-point Likert scale                                                                                                                                                                        | 32-224 with lower scores suggesting a more positive view of older adults. | English?     |              |
| (Villar Posada, 1997)          | Spanish version of the ASD (Diferencial Semántico del envejecimiento) | Self-administered, paper and pencil  | 31 pairs of bipolar adjectives obtained from those used in other scales to assess attitudes towards older adults, as well as those arising in interviews with people of different ages conducted by the authors in previous studies                         | 7-point semantic differential scale ranging from a more negative attitude (1) to a more positive attitude (7) for each pair of bipolar adjectives. A score of 4 represented a neutral score | Not reported                                                              | English?     | Spanish?     |
| (Polizzi and Millikin, 2002)   | ASD                                                                   | Self-administered, paper and pencil  | 24 polar adjective pairs and the following target objects: "old man" and "old woman"; "elderly man" and "elderly woman"; "man 70-85 years of age" and "woman 70-85 years of age"                                                                            | 7-point Likert scale                                                                                                                                                                        | Not reported                                                              | 24-168       | English?     |

| Author                     | Specific questionnaire                          | Form of administration (e.g. Self or other administered, online or face-to-face) | Subscale/s # of items                                                                                                                                                                                                                                                                               | Response options                                                                                              | Range of scores/scoring | Original language | Available translation |
|----------------------------|-------------------------------------------------|----------------------------------------------------------------------------------|-----------------------------------------------------------------------------------------------------------------------------------------------------------------------------------------------------------------------------------------------------------------------------------------------------|---------------------------------------------------------------------------------------------------------------|-------------------------|-------------------|-----------------------|
| (Polizzi, 2003)            | The Refined Aging Semantic Differential (R-ASD) | Self-administered, paper and pencil                                              | 81 bipolar adjectives assigned to the following target objects: man 70–85 years of age and a woman 70–85 years of age. 30 slightly modified pairs were taken from the original 32 pairs of the Aging Semantic Differential.                                                                         | 7-point Likert scale. A score of 4 represented missing data                                                   | Not reported            | English?          | Not reported          |
| (Polizzi, 2003)            | R-ASD                                           | Self-administered, paper and pencil                                              | 66 bipolar adjective pairs                                                                                                                                                                                                                                                                          | 7-point Likert scale. A score of 4 represented missing data                                                   | Not reported            | English?          | Not reported          |
| (Stewart et al., 2007)     | ASD                                             | Not reported                                                                     | 32 bipolar adjectives, including both a 3 and a 4-factor model                                                                                                                                                                                                                                      | 5-point Likert scale                                                                                          | Not reported            | English?          | Not reported          |
| (Iwasaki and Jones, 2008)  | R-ASD                                           | Paper and pencil-study 1, computer administration                                | 24 items consisting of 24 bipolar adjectives covering the following sub-scales: Instrumental-Ineffective (I-I), Autonomous-Dependent (A-D), and Personal Acceptability-Unacceptability (PA-D). Questionnaire target objects: males age 20–30, males age 40–45, and males age 70–85.                 | 7-point Likert scale,                                                                                         | Not reported            | English?          | Not reported          |
| (Iwasaki and Jones, 2008)  | R-ASD                                           | Paper and pencil-study 1, computer administration                                | 24 items consisting of 24 bipolar adjectives covering the following sub-scales: Instrumental-Ineffective (I-I), Autonomous-Dependent (A-D), and Personal Acceptability-Unacceptability (PA-D). Questionnaire target objects: older adults                                                           | 7-point Likert scale,                                                                                         | Not reported            | English?          | Not reported          |
| (Boudjemad and Gana, 2009) | ASD                                             | Self-administered                                                                | 26 bipolar items, including 4 factors (Instrumentality of older adults, Autonomy, Acceptability of older people, and Integrity of older people)                                                                                                                                                     | Not reported                                                                                                  | Not reported            | English           | French                |
| (Gluth et al., 2010)       | ASD                                             | Not reported                                                                     | 32 pairs of bipolar adjectives, including a 3-factor structure (Instrumental-ineffective; Autonomous-dependent; Personal Acceptability-unacceptability)                                                                                                                                             | 7-point Likert scale with lower scores representing a more positive attitude on the respective adjective pair | Not reported            | English           | German                |
| (Gluth et al., 2010)       | ASD                                             | Not reported                                                                     | Final model 26 items, 4 factors                                                                                                                                                                                                                                                                     | 7-point Likert scale with lower scores representing a more positive attitude on the respective pair           | Not reported            | English           | German                |
| (Gonzales et al., 2010)    | R-ASD                                           | Self-administered, Paper and pencil format questionnaire                         | 24 items, including the original 3 factors. The questionnaire target object was modified to refer to individuals 65 and over                                                                                                                                                                        | 7-point Likert scale                                                                                          | 24-168                  | English?          |                       |
| (Carlson, 2015)            | R-ASD                                           | Online                                                                           | 117 descriptors from various questionnaires. The questionnaire was considered to reflect the 3 original sub-scales (Personality, Social/Emotional, Physical), but was after testing found to have an alternative 3 sub-scales (Physical stereotypes, Positive Stereotypes and Negative Stereotypes) | 11-point Likert scale ranging from 0 to 100% in 10% intervals                                                 | Not reported            | Not reported      | Not reported          |
| (Carlson, 2015)            | R-ASD                                           | Online                                                                           | 117 descriptors from various questionnaires, including 21 from Polizzi, 77 from Goldberg, 29 from Robinson and Andersen, 19 from Almerico and Fillmer, 43 from Schmidt and Bolland, and 3 from Boduroglu et al. The questionnaire was considered to reflect the 3 original                          | 5-point Likert scale ranging from none to all                                                                 | Not reported            | Not reported      | Not reported          |

| Author                                         | Specific questionnaire                      | Form of administration (e.g. Self or other administered, online or face-to-face)                    | Subscale/s # of items                                                                                                                                                                                                                                                                                                                                                                                                                                                                                                                                                                | Response options                                                                                    | Range of scores/scoring | Original language | Available translation |
|------------------------------------------------|---------------------------------------------|-----------------------------------------------------------------------------------------------------|--------------------------------------------------------------------------------------------------------------------------------------------------------------------------------------------------------------------------------------------------------------------------------------------------------------------------------------------------------------------------------------------------------------------------------------------------------------------------------------------------------------------------------------------------------------------------------------|-----------------------------------------------------------------------------------------------------|-------------------------|-------------------|-----------------------|
| (Gonzales et al., 2017)                        | ASD                                         | Self-administered, paper and pencil                                                                 | sub-scales (Personality, Social/Emotional, Physical), but was after testing was found to have an alternative 3 sub-scales (Physical stereotypes, Positive Stereotypes and Negative Stereotypes)<br><br>32 pairs of bipolar adjectives, including a 3-factor structure (Instrumental-ineffective; Autonomous-dependent; Personal acceptability-unacceptability).3 items were dropped based on testing results, and the 3 original factors were not confirmed. Three different meaningful factors emerged instead (Personality and mental health, Societal participation and Physical) | 7-point Likert scale with lower scores representing a more positive attitude on the respective pair | Not reported            | English?          | Mandarin Chinese      |
| <b>Anxiety about Aging Scale (AAS)</b>         |                                             |                                                                                                     |                                                                                                                                                                                                                                                                                                                                                                                                                                                                                                                                                                                      |                                                                                                     |                         |                   |                       |
| (Lasher, 1987)                                 | AAS                                         | Self-administered, paper and pencil                                                                 | 20 items, including 4 subscales, which resulted from the study of an original scale including 84 items                                                                                                                                                                                                                                                                                                                                                                                                                                                                               | 5-point Likert scale                                                                                | Not reported            | English?          | Not reported          |
| (Watkins et al., 1998)                         | AAS                                         | Self-administered, paper and pencil                                                                 | 20 items, including modifications of the original AAS                                                                                                                                                                                                                                                                                                                                                                                                                                                                                                                                | Not reported                                                                                        | Not reported            | English?          | Not reported          |
| (Rivera-Ledesma et al., 2007)                  | Revised- Anxiety about Ageing Scale (R-AAS) | Not reported                                                                                        | The original Anxiety about ageing scale is used as well as the adapted scale for older Mexican adults. Both included 20 items, and identified 4 sub-scales (Fear of older adults, psychological worries, physical appearance, fear of losses)                                                                                                                                                                                                                                                                                                                                        | 4-point Likert scale                                                                                | Not reported            | English?          | Spanish               |
| (Gao, 2012)                                    | AAS                                         | Self-administered, paper and pencil, and self-administered online                                   | 16 items, including 4 subscales, which resulted from the study testing of the original 20 item scale                                                                                                                                                                                                                                                                                                                                                                                                                                                                                 | 5-point Likert scale, from strongly agree (1) to strongly disagree (5)                              | Not reported            | English           | Chinese               |
| (Koukoulis et al., 2013)                       | AAS                                         | Self-administered? paper and pencil?                                                                | 20 items, including 4 subscales of five items each (fear of old people, psychological concerns about ageing, anxiety about physical appearance, fear of losses associated with ageing).                                                                                                                                                                                                                                                                                                                                                                                              | 4-point Likert scale, from strongly agree (1) to strongly disagree (4)                              | Not reported            | English           | Greek                 |
| (Sargent-Cox et al., 2014)                     | AAS                                         | Self-administered, with 84.3% of sample using a paper and pencil format, and 15.7% an online format | 20 items, including 4 subscales (fear of old people, psychological concerns, physical appearance, fear of losses)                                                                                                                                                                                                                                                                                                                                                                                                                                                                    | 5-point Likert scale                                                                                | Not reported            | English?          | Not reported          |
| <b>Attitudes to Ageing Questionnaire (AAQ)</b> |                                             |                                                                                                     |                                                                                                                                                                                                                                                                                                                                                                                                                                                                                                                                                                                      |                                                                                                     |                         |                   |                       |
| (Laidlaw et al., 2007)                         | AAQ                                         | Self-administered, paper and pencil                                                                 | 24 items, including 3 sub-scales (Psychological growth, Psychosocial loss, and Physical change) was the resulting questionnaire from the study, evolving from a 44-item scale with 5 sub-scales                                                                                                                                                                                                                                                                                                                                                                                      | 5-point Likert scale ranging from 1 (strongly disagree) to 5 (strongly agree)                       | Not reported            | English           | Not reported          |

| Author                        | Specific questionnaire | Form of administration (e.g. Self or other administered, online or face-to-face)        | Subscale/s # of items                                                                                                        | Response options                                                              | Range of scores/scoring        | Original language | Available translation |
|-------------------------------|------------------------|-----------------------------------------------------------------------------------------|------------------------------------------------------------------------------------------------------------------------------|-------------------------------------------------------------------------------|--------------------------------|-------------------|-----------------------|
| (Chachamovich et al., 2008)   | AAQ                    | Not reported                                                                            | 22 items, including 3 subscales was the resulting questionnaire from the study, which evolved from an original 44-item scale | 4-point Likert scale which evolved from a 5-point Likert scale                | Not reported                   | English           | Portuguese?           |
| (Kalfoss et al., 2010)        | AAQ                    | Self-administered, paper and pencil                                                     | 24 items, including 3 subscales                                                                                              | 5-point Likert scale ranging from 1 (strongly disagree) to 5 (strongly agree) | Not reported                   | English           | Norwegian             |
| (Lucas-Carrasco et al., 2013) | AAQ                    | Self-administered questionnaire                                                         | 24 items, including 3 subscales with 8 items each (Psychosocial loss, Physical change, Psychological growth)                 | 5-point Likert scale                                                          | 8-40                           | English           | Spanish               |
| (Shenkin et al., 2014)        | AAQ                    | Self-administered, paper and pencil                                                     | 24 items, including 3 subscales                                                                                              | 5-point Likert scale ranging from 1 (strongly disagree) to 5 (strongly agree) | Not reported                   | English           | Not reported          |
| (Brown et al., 2015)          | AAQ                    | Self-administered                                                                       | 24 items, including 3 dimensions (physical change, psychological growth, psychosocial loss)                                  | 5-point Likert scale ranging from 1 (strongly disagree) to 5 (strongly agree) | Not reported                   | English?          | N/A                   |
| (Helmes and Pachana, 2016)    | AAQ                    | Self-administered, paper and pencil                                                     | Not reported                                                                                                                 | Not reported                                                                  | Not reported                   | Not reported      | Not reported          |
| (Marquet et al., 2016)        | AAQ                    | Both Self-administered paper and pencil, and face to face interview (87% of the sample) | 24 items, including 3 subscales (psychosocial loss, physical change and psychological growth)                                | 5-point Likert scale ranging from 1 (strongly disagree) to 5 (strongly agree) | 8-40 for each subscale         | English           | French                |
| (Rejeh et al., 2017)          | AAQ                    | Both Self-administered paper and pencil, and face to face interview for illiterates     | 24 items, including 3 subscales (psychosocial loss, physical change and psychological growth)                                | 5-point Likert scale ranging from 1 (strongly disagree) to 5 (strongly agree) | 8-40 points per each dimension | English           | Farsi                 |

#### Expectations Regarding Aging (ERA)

|                          |                                         |                                            |                                                                                                                                                                                                                                                                                                                         |                                                                               |                                            |         |              |
|--------------------------|-----------------------------------------|--------------------------------------------|-------------------------------------------------------------------------------------------------------------------------------------------------------------------------------------------------------------------------------------------------------------------------------------------------------------------------|-------------------------------------------------------------------------------|--------------------------------------------|---------|--------------|
| (Sarkisian et al., 2001) | ERA                                     | Not relevant                               | 26 domains of expectations regarding aging were identified through the focus group discussions                                                                                                                                                                                                                          | Not relevant                                                                  | Not relevant                               | English | Not reported |
| (Sarkisian et al., 2002) | ERA-38                                  | Self-administered, mailed paper and pencil | 38 items, including 10 sub-scales (general health, cognitive function, mental health, functional independence, sexual function, pain, sleep, fatigue, urinary incontinence, and appearance). Half of the items concern expectations regarding one's own aging, and the other half concern general expectations of aging | 4-point Likert scale ranging from 1 (definitely true) to 4 (definitely false) | 0-100 for ERA-38 as well as for each scale | English | Not reported |
| (Sarkisian et al., 2005) | ERA-38 & shortened ERA-12 (1999 sample) | self-administered, mailed paper and pencil | 38 items, which were subsequently reduced to 12 items, including 3 factors with four items each (Factor 1- expectations regarding physical health, Factor 2- expectations regarding mental health, Factor 3- expectations regarding cognitive functioning)                                                              | 4-point Likert scale ranging from 1 (definitely true) to 4 (definitely false) | Not reported                               | English | Not reported |

| Author                   | Specific questionnaire                 | Form of administration (e.g. Self or other administered, online or face-to-face)                                                                                                             | Subscale/s # of items                                                                                                                                                                                                                                                                                                                                                                                                                                                                                                                                                                                                                            | Response options                                                                                                                              | Range of scores/scoring                                     | Original language | Available translation |
|--------------------------|----------------------------------------|----------------------------------------------------------------------------------------------------------------------------------------------------------------------------------------------|--------------------------------------------------------------------------------------------------------------------------------------------------------------------------------------------------------------------------------------------------------------------------------------------------------------------------------------------------------------------------------------------------------------------------------------------------------------------------------------------------------------------------------------------------------------------------------------------------------------------------------------------------|-----------------------------------------------------------------------------------------------------------------------------------------------|-------------------------------------------------------------|-------------------|-----------------------|
| (Sarkisian et al., 2005) | ERA-38 & shortened ERA-1 (2001 sample) | only reported for reliability testing where paper and pencil forms were mailed                                                                                                               | 12 items including e factors as identified in the 1999 sample (Factor 1- expectations regarding physical health, Factor 2- expectations regarding mental health, Factor 3-expectations regarding cognitive functioning)                                                                                                                                                                                                                                                                                                                                                                                                                          | 4-point Likert scale ranging from 1 (definitely true) to 4 (definitely false)                                                                 | Not reported                                                | English           | Spanish               |
| (Joshi et al., 2010)     | ERA-12                                 | self-administered, paper and pencil?                                                                                                                                                         | 12 items, including 3 subscales with 4 items each: expectations regarding physical health, expectations regarding mental health, and expectations regarding cognitive function                                                                                                                                                                                                                                                                                                                                                                                                                                                                   | 4-point Likert scale ranging from 'definitely true' to 'definitely false' response options                                                    | 0-100, with lower scores indicating expectations of decline | English           | Not reported          |
| (Beser et al., 2012)     | ERA-12                                 | researchers administered questionnaire, paper and pencil?                                                                                                                                    | 12 items, including 3 subscales: physical health, mental health, cognitive functions (4 items per subscale)                                                                                                                                                                                                                                                                                                                                                                                                                                                                                                                                      | 4-point Likert scale, ranging from 1 (definitely true) to 4 (definitely false)                                                                | 0-100 per sub-scale, and 0-100 for entire scale             | English           | Turkish               |
| (Sparks et al., 2013)    | ERA-38                                 | 36% self-administered & completed on site using paper and pencil, 13% self-administered & returned by post using paper and pencil, and 51% self-administered using an on-line survey format. | 38 items including 2 subscales, one called Aging Self-expectations (ASE) with 18 items, and another one called General Aging Expectations (GAE) with 20 items. Analysis were conducted separately for each sub-scale. For ASE, 8 items failed to load, and 3 factors were identified: Factor 1-self-perceived functional health with aging, Factor 2- self-perceived social health with aging, Factor 3- self-perceived sexual function with aging. For GAE, 8 items failed to load and 3 factors were identified: Factor 1-satisfaction contentment with aging, Factor 2-physical function with aging, Factor 3- cognitive function with aging. | 4-point Likert scale ranging from 1 (definitely true) to 4 (definitely false). Higher values on the scale indicate more positive expectations | Not reported                                                | English?          | Not reported          |

#### Facts on Aging Quiz (FAQ)

|                           |                              |                                     |          |              |                                                          |          |              |
|---------------------------|------------------------------|-------------------------------------|----------|--------------|----------------------------------------------------------|----------|--------------|
| (Palmore, 1977)           | FAQ                          | Not reported                        | 25 items | True/False   | % of correct                                             | English? |              |
| (Klemmack, 1978)          | FAQ                          | Self-administered, paper and pencil | 25 items | True/False   | % of correct answers and negative and positive bias item | English? | Not reported |
| (Holtzman and Beck, 1979) | FAQ                          | Self-administered, paper and pencil | 25 items | True/False   | Not reported                                             | English? | Not reported |
| (Miller and Dodder, 1980) | FAQ                          | Not reported                        | 25 items | Not reported | Not reported                                             | English? | Not reported |
| (Miller and Dodder, 1980) | Miller-Dodder Revision (MDR) | Not reported                        | 25 items | Not reported | Not reported                                             | English? | Not reported |
| (Laner, 1981)             | FAQ                          | Self-administered, paper and pencil | 25 items | True/False   | Not reported for the scale only for samples              | English? | Not reported |



| Author                          | Specific questionnaire                         | Form of administration<br>(e.g. Self or other administered, online or face-to-face) | Subscale/s # of items                                                                                                                        | Response options       | Range of scores/scoring                          | Original language | Available translation |
|---------------------------------|------------------------------------------------|-------------------------------------------------------------------------------------|----------------------------------------------------------------------------------------------------------------------------------------------|------------------------|--------------------------------------------------|-------------------|-----------------------|
| (Luszcz, 1982)                  | FAQ                                            | Self-administered, paper and pencil                                                 | 25 items                                                                                                                                     | True/False             | % of errors                                      | English           | Not reported          |
| (Romeis and Sussman, 1982)      | FAQ                                            | Not reported                                                                        | 25 items                                                                                                                                     | Not reported           | Not reported                                     | English?          | Japanese?             |
| (Matthews et al., 1984)         | FAQ                                            | Not reported                                                                        | 25 items (substituting the term Canada in item 19)                                                                                           | True/False             | % of errors                                      | English?          | English?              |
| (Miller and Dodder, 1984)       | FAQ & MDR                                      | Not reported                                                                        | 25 items                                                                                                                                     | Not reported           | % of correct                                     | English?          | Not reported          |
| (Courtenay and Weidemann, 1985) | FAQ 1                                          | Self-administered?<br>Paper and pencil?                                             | 25 items                                                                                                                                     | True/False             | % of incorrect                                   | English?          | Not reported          |
| (Courtenay and Weidemann, 1985) | FAQ 1                                          | Self-administered?<br>Paper and pencil?                                             | 25 items                                                                                                                                     | True/False/Don't know. | % of incorrect,<br>% of 'don't know'             | English?          | Not reported          |
| (Courtenay and Weidemann, 1985) | FAQ 2                                          | Self-administered?<br>Paper and pencil?                                             | 25 items                                                                                                                                     | True/False             | % of incorrect                                   | English?          | Not reported          |
| (Courtenay and Weidemann, 1985) | FAQ 2                                          | Self-administered?<br>Paper and pencil?                                             | 25 items                                                                                                                                     | True/False/Don't know  | % of incorrect,<br>% of 'don't know'             | English?          | Not reported          |
| (Dail and Johnson, 1983, 1986)  | FAQ                                            | Not reported                                                                        | Not reported                                                                                                                                 | Not reported           | Not reported                                     | Not reported      | Not reported          |
| (McCutcheon, 1986)              | Psychological Facts on Aging Quiz (PFA)        | Not reported                                                                        | 22 items (3 new items; #6 FAQ; #10 FAQ2; #3 Miller & Doddler FAQ)                                                                            | True/False             | Not reported                                     | English?          | Not reported          |
| (Donnelly et al., 1987)         | Revised FAQ & Dye and Sassenrath Aging Test    | Not reported                                                                        | 25 items from the revised Facts on Aging Quiz and 40 items from the Dye and Sassenrath test FAQ, tested as a combined and as separate scales | Not reported           | Not reported                                     | Not reported      | Not reported          |
| (Norris et al., 1987)           | FAQ                                            | Not reported                                                                        | 25 items including some modifications (e.g. substituting "United States" in statement 19 with "Canadian")                                    | Not reported           | Not reported                                     | English?          | Not reported          |
| (Kline et al., 1990)            | FAQ & Knowledge of Aging and the Elderly (KAE) | Self-administered, paper and pencil                                                 | 25 items                                                                                                                                     | True/False             | Mean number of correct answers per questionnaire | English?          | Not reported          |

| Author                     | Specific questionnaire                               | Form of administration<br>(e.g. Self or other administered, online or face-to-face) | Subscale/s # of items                                                                                                                 | Response options                                                                                 | Range of scores/scoring                          | Original language | Available translation |
|----------------------------|------------------------------------------------------|-------------------------------------------------------------------------------------|---------------------------------------------------------------------------------------------------------------------------------------|--------------------------------------------------------------------------------------------------|--------------------------------------------------|-------------------|-----------------------|
| (Kline et al., 1990)       | FAQ & KAE                                            | Self-administered, paper and pencil                                                 | 25 items                                                                                                                              | True/False                                                                                       | Mean number of correct answers per questionnaire | English?          | Not reported          |
| (Kline and Kline, 1991a)   | FAQ and the Knowledge of Aging and the Elderly (KAE) | Self-administered, paper and pencil?                                                | 50 items in total including 25 items from the FAQ and 25 items from the KAE.                                                          | True/False?                                                                                      | Not reported                                     | English?          | Not reported          |
| (Kline and Kline, 1991b)   | FAQ & KAE                                            | Not reported                                                                        | 50 items in total including 25 items from the FAQ and 25 items from the KAE. Minor changes were made to reflect Canadian terminology. | Not reported with the exception that 2 KAE items would be scored differently: correct, incorrect | 0-25 per scale                                   | Not reported      | Not reported          |
| (O'Hanlon et al., 1993)    | FAQ                                                  | Self-administered, paper and pencil                                                 | 25                                                                                                                                    | True/False                                                                                       | Not reported                                     | Not reported      | Not reported          |
| (O'Hanlon et al., 1993)    | KAE                                                  | Self-administered, paper and pencil                                                 | 25                                                                                                                                    | True/False                                                                                       | Not reported                                     | Not reported      | Not reported          |
| (Lusk et al., 1995)        | FAQ 1                                                | Not reported                                                                        | 25                                                                                                                                    | True/False                                                                                       | Not reported                                     | English?          | Not reported          |
| (Lusk et al., 1995)        | FAQ 2                                                | Not reported                                                                        | 25                                                                                                                                    | True/False                                                                                       | Not reported                                     | English?          | Not reported          |
| (Harris and Changas, 1994) | FAQ 2- Multiple choice (MC)                          | Not reported                                                                        | 25 items, the scoring of #16 was changed to True; used the term African American instead of Black                                     | Multiple choice with 4 response options                                                          | 0-25                                             | English?          | Not reported          |
| (Harris and Changas, 1994) | FAQ 2- True/False (T/F)                              | Not reported                                                                        | 25 items, the scoring of #16 was changed to True                                                                                      | True/False                                                                                       | 0-25                                             | English?          | Not reported          |
| (Harris et al., 1996)      | FAQ 1 T/F                                            | Not reported                                                                        | Not reported. Some modifications to the wording of the items.                                                                         | True/False                                                                                       | 0-25                                             | English?          | Not reported          |
| (Harris et al., 1996)      | FAQ 1-MC                                             | Not reported                                                                        | Not reported                                                                                                                          | Multiple choice with 4 response options                                                          | 0-25                                             | English?          | Not reported          |
| (Kramer et al., 2001)      | FAQ-TF                                               | Not reported                                                                        | 25 items                                                                                                                              | True/False                                                                                       | % of correct                                     | English?          | Not reported          |
| (Kramer et al., 2001)      | FAQ-MC                                               | Not reported                                                                        | 25 items                                                                                                                              | Multiple choice                                                                                  | % of correct                                     | English?          | Not reported          |
| (Obiekwe, 2001)            | FAQ I- TF                                            | Not reported                                                                        | 25 items                                                                                                                              | True/False                                                                                       | Not reported                                     | English?          | Not reported          |
| (Obiekwe, 2001)            | FAQ I- MC                                            | Not reported                                                                        | 25 items                                                                                                                              | Multiple choice                                                                                  | Not reported                                     | English?          | Not reported          |
| (Obiekwe, 2001)            | FAQ II- TF                                           | Not reported                                                                        | 25 items                                                                                                                              | True/False                                                                                       | Not reported                                     | English?          | Not reported          |

| Author                       | Specific questionnaire                                 | Form of administration (e.g. Self or other administered, online or face-to-face) | Subscale/s # of items                                                                                                                                                                                                            | Response options                                         | Range of scores/scoring                          | Original language | Available translation |
|------------------------------|--------------------------------------------------------|----------------------------------------------------------------------------------|----------------------------------------------------------------------------------------------------------------------------------------------------------------------------------------------------------------------------------|----------------------------------------------------------|--------------------------------------------------|-------------------|-----------------------|
| (Obiekwe, 2001)              | FAQ II- MC                                             | Not reported                                                                     | 25 items                                                                                                                                                                                                                         | Multiple choice                                          | Not reported                                     | English?          | Not reported          |
| (Pennington, 2001)           | FAQ 1-TF                                               | Not reported                                                                     | 25 items with some revisions to account for the context in New Zealand. 16 items maintained following revision                                                                                                                   | True/False                                               | Not reported                                     | English?          | Not reported          |
| (Pennington, 2001)           | FAQ 1 (TF/Don't Know format - DK)                      | Not reported                                                                     | 25 items with some revisions to account for the context in New Zealand. 16 items maintained following revision                                                                                                                   | True/False/Don't know                                    | Not reported                                     | English?          | Not reported          |
| (Seufert and Carrozza, 2002) | FAQ 1 & 2                                              | Self-administered, paper and pencil                                              | 50 items including 25 from FAQ1 and 25 from FAQ 2, and including some wording modifications                                                                                                                                      | True/False/Don't know                                    | % of correct                                     | English?          | Not reported          |
| (Cowan et al., 2004)         | R-FAQ                                                  | Not reported                                                                     | 25 items with some modifications, and including 15 negative bias questions, 5 positive bias questions, 5 neutral questions                                                                                                       | Not reported                                             | Not reported                                     | Not reported      | Not reported          |
| (Runkawatt, 2007)            | FAQ                                                    | Self-administered?, paper and pencil                                             | 25 items with 6 items revised in the final model                                                                                                                                                                                 | True/False                                               | Not reported                                     | English           | Thai                  |
| (Unwin et al., 2008)         | FAQ 1                                                  | Not reported                                                                     | Not reported                                                                                                                                                                                                                     | Not reported                                             | 0-25                                             | Not reported      | Not reported          |
| (Wang et al., 2010)          | FAQ 1                                                  | Self-administered, paper and pencil                                              | 25 items with some wording modifications                                                                                                                                                                                         | True/False/Don't know                                    | 0-25, % of correct                               | English           | Chinese               |
| (Nakao et al., 2013)         | Knowledge of Aging for Social Workers (version of FAQ) | Not reported                                                                     | 25 items, including items from part III Facts of the FAQ on Aging Mental Health                                                                                                                                                  | 5 multiple-choices for response including 'I don't know' | 0-25 (possible), 0-22 (obtained by participants) | Not reported      | Not reported          |
| (Pachana et al., 2013)       | FAQ2 -MC                                               | Not reported                                                                     | 25 items with some modifications                                                                                                                                                                                                 | Multiple choice                                          | % of correct                                     | English?          | English?              |
| (Van der Elst et al., 2014)  | R-FAQ (based on FAQ1 and FAQMH)                        | Not reported                                                                     | 36 items (FAQ1 and FAMHQ were used as a basis for developing the revised version). 22 items of the original FAQ1 and 12 items from the FAMHQ were used. 2 new items about life expectancy and risk of physical injury were added | True/False/Don't know                                    | Not reported                                     | English?          | Dutch                 |
| (Helmes, 2016)               | FAQ2 -MC                                               | Not reported                                                                     | 25 items with some modifications to the scoring key for 4 items and other changes to meet the Canadian context                                                                                                                   | Not reported                                             | 0-25                                             | Not reported      | Not reported          |
| (Helmes and Pachana, 2016)   | FAQ2 -MC                                               | Self-administered, paper and pencil?                                             | Not reported                                                                                                                                                                                                                     | Not reported                                             | Not reported                                     | Not reported      | Not reported          |
| (Shiovitz-Ezra et al., 2016) | FAQ 1                                                  | Phone                                                                            | 12 out of the original 25 items were used based on face validity                                                                                                                                                                 | Not reported                                             | Not reported                                     | English           | Hebrew                |

#### Fraboni Scale of Ageism (FSA)

| Author                       | Specific questionnaire              | Form of administration<br>(e.g. Self or other administered, online or face-to-face) | Subscale/s # of items                                                                                                                                                                                                                                                           | Response options                                                                                                                                                                                                           | Range of scores/scoring | Original language | Available translation |
|------------------------------|-------------------------------------|-------------------------------------------------------------------------------------|---------------------------------------------------------------------------------------------------------------------------------------------------------------------------------------------------------------------------------------------------------------------------------|----------------------------------------------------------------------------------------------------------------------------------------------------------------------------------------------------------------------------|-------------------------|-------------------|-----------------------|
| (Fraboni et al., 1990)       | FSA                                 | Self-administered, paper and pencil                                                 | 44 items (out of the 50 original items), including avoidance (10), discrimination (9) and anti-locution constructs (10)                                                                                                                                                         | 4-point Likert scale from strongly disagree to strongly agree. Responses were scored from 1-5 for negative items and 5-1 for positive items, with unanswered items scored as 3. A high score is indicative of high ageism. | Not reported            | English?          | Not reported          |
| (Fraboni et al., 1990)       | FSA                                 | Self-administered, paper and pencil                                                 | 29 items (15 items of the 44 original items were dropped during the study to enhance the psychometric properties of the scale). These items corresponded to three different constructs: Antilocution (10) Discrimination (9) and Avoidance (10)                                 | 4-point Likert scale ranging from strongly disagree to strongly agree. Responses were scored from 1-5 for negative items and 5-1 for positive items, with unanswered items scored as 3.                                    | Not reported            | English?          | Not reported          |
| (Boudjemad and Gana, 2009)   | FSA                                 | Not reported                                                                        | 23 items, including 3 dimensions (stereotypes, separation, and affective attitude). 9 items were dropped following testing, which results in a new version of the scale called FSA-14.                                                                                          | 5-point Likert scale                                                                                                                                                                                                       | Not reported            | English           | French                |
| (Boudjemad and Gana, 2009)   | Fraboni Scale of Ageism 14 (FSA-14) | Not reported                                                                        | 14 items, including 3 dimensions                                                                                                                                                                                                                                                | 5-point Likert scale                                                                                                                                                                                                       | Not reported            | English           | French                |
| (Rupp et al., 2005)          | FSA                                 | Self-administered, paper and pencil?                                                | Originally 29 items corresponding to a 3-factor model: beliefs about older adults (10 items); separation factor (8); affective (4). 6 items were excluded given findings in confirmatory factor analyses, resulting in a 23-item instrument (stereotype, separation, affective) | 4-point Likert scale from 1(strongly disagree)-4(strongly agree)                                                                                                                                                           | Not reported            | English?          | Not reported          |
| (Bodner and Lazar, 2008)     | FSA                                 | Self-administered, paper and pencil                                                 | 22 items (out of the original 29 FSA items, including 3 factors: Avoidance (8), Contribution (5), Stereotypes (6)                                                                                                                                                               | Not reported                                                                                                                                                                                                               | Not reported            | English?          | Not reported          |
| (Lin et al., 2010)           | FSA                                 | Computer?                                                                           | 29 items                                                                                                                                                                                                                                                                        | 4-point Likert scale                                                                                                                                                                                                       | Not reported            | Not reported      | Not reported          |
| (Kutlu et al., 2012)         | FSA                                 | Self-administered, paper and pencil                                                 | From the original 29 items, 4 were dropped due to low total correlation of the items. The scale included 3 factors: Stereotypes (11), Avoidance (9), Discrimination (5)                                                                                                         | 4-point Likert scale from 1(strongly disagree)-4(strongly agree)                                                                                                                                                           | 29-116                  | English           | Turkish               |
| (Helmes and Pachana, 2016)   | FSA                                 | Self-administered, paper and pencil                                                 | Not reported                                                                                                                                                                                                                                                                    | Not reported                                                                                                                                                                                                               | Not reported            | Not reported      | Not reported          |
| (Shiovitz-Ezra et al., 2016) | FSA                                 | Phone                                                                               | 24 items, including 3 factors: Positive perceptions of aging, negative perceptions of aging, and contribution to society                                                                                                                                                        | 6-point Likert scale from 1 (not agree at all) to 6 (totally agree)                                                                                                                                                        | 24-144                  | English           | Hebrew                |

| Author                                            | Specific questionnaire                               | Form of administration (e.g. Self or other administered, online or face-to-face) | Subscale/s # of items                                                                                                                   | Response options                                                                                                       | Range of scores/scoring | Original language | Available translation |
|---------------------------------------------------|------------------------------------------------------|----------------------------------------------------------------------------------|-----------------------------------------------------------------------------------------------------------------------------------------|------------------------------------------------------------------------------------------------------------------------|-------------------------|-------------------|-----------------------|
| <b>Image of Aging Scale (IAS)</b>                 |                                                      |                                                                                  |                                                                                                                                         |                                                                                                                        |                         |                   |                       |
| (Levy et al., 2004)                               | IAS                                                  | Not reported                                                                     | 18 items, including 9 domains (1 positive, 1 negative item)                                                                             | 0-6 scale                                                                                                              | 0 – 54                  | English?          | English               |
| (Bai et al., 2012)                                | Self-Image of Aging Scale                            | Face to face interview                                                           | 14 items, including 5 domains                                                                                                           | 5-point Likert scale                                                                                                   | Not reported            | English           | Chinese               |
| (Fernández-Ballesteros et al., 2017)              | IAS                                                  | Not reported                                                                     | 18 items, including 9 domains (1 positive, 1 negative item)                                                                             | 7-point Likert scale                                                                                                   | Not reported            | English?          | Spanish               |
| <b>Kogan's Attitudes toward Old People (KAOP)</b> |                                                      |                                                                                  |                                                                                                                                         |                                                                                                                        |                         |                   |                       |
| (Kogan, 1961)                                     | KAOP                                                 | Not reported                                                                     | 34 items, including two subscales of 17 items each                                                                                      | 7 response options ranging from "strongly disagree" to "strongly agree." A score of 4 was assigned to items left blank | Not reported            | English?          | Not reported          |
| (Hicks et al., 1976)                              | KAOP                                                 | Self-administered? paper and pencil?                                             | 34 items                                                                                                                                | Not reported                                                                                                           | Not reported            | Not reported      | Not reported          |
| (Wingard, 1980)                                   | KAOP                                                 | Self-administered? paper and pencil?                                             | Not reported specifically though mention that minor changes were made to the questionnaire to reflect Canadian culture                  | Not reported                                                                                                           | Not reported            | English?          | Not reported          |
| (Hilt, 1997)                                      | Revised Attitudes towards Old People Scale (R- KAOP) | Self-administered, paper and pencil?                                             | 22 items kept from the original Kogan scale of 34 items                                                                                 | Likert scale ranging from strongly disagree (1) to strongly agree (7). Items left without response (4)                 | Not reported            | English?          | Not reported          |
| (Söderhamn et al., 2000)                          | KAOP                                                 | Self-administered questionnaire                                                  | 34 items, including 17 negative items and 17 positive items                                                                             | Likert scale with 5 response categories                                                                                | Not reported            | English?          | Swedish               |
| (Lambrinou et al., 2005)                          | KAOP                                                 | Self-administered, paper and pencil                                              | 34 items, including two subscales of 17 items each (one reflecting negative sentiments towards older people and the other one positive) | Likert scale with 6 consecutive alternative response categories                                                        | Not reported            | English           | Greek                 |
| (Ogiwara et al., 2007)                            | Attitudes Towards the Elderly Scale                  | Self-administered paper and pencil                                               | 34 items, including two subscales, though the study identified 3 factors                                                                | Likert scale ranging from strongly disagree (1) to strongly agree (7). Items left without response (4)                 | 34-238                  | English           | Japanese              |
| (Runkawatt, 2007)                                 | KAOP                                                 | Paper and pencil                                                                 | 34 items, including 17 matched positive/negative pairs of statements about older adults                                                 | 7-point Likert scale ranging from strongly disagree (1) to strongly agree (7)                                          | Not reported            | English           | Thai                  |
| (Iwasaki and Jones, 2008)                         | KAOP                                                 | Paper and pencil                                                                 | 34 items, including 17 positive and 17 negative items                                                                                   | 7-point Likert scale ranging from strongly disagree (1) to strongly agree (7)                                          | Not reported            | English?          | Not reported          |
| (Iwasaki and Jones, 2008)                         | KAOP                                                 | Paper and pencil                                                                 | Only 17 positive items from the original 34 items,                                                                                      | 7-point Likert scale ranging from strongly disagree (1) to strongly agree (7)                                          | Not reported            | English?          | Not reported          |

| Author                       | Specific questionnaire | Form of administration (e.g. Self or other administered, online or face-to-face) | Subscale/s # of items                                                                                                      | Response options                                                                                        | Range of scores/scoring      | Original language | Available translation                                                         |
|------------------------------|------------------------|----------------------------------------------------------------------------------|----------------------------------------------------------------------------------------------------------------------------|---------------------------------------------------------------------------------------------------------|------------------------------|-------------------|-------------------------------------------------------------------------------|
| (Helmes and Campbell, 2009)  | KAOP                   | Self-administered, and both paper and pencil and online formats used             | 34 items, including two subscales of 17 items each                                                                         | 7-point Likert scale                                                                                    | Not reported                 | English?          | Not reported                                                                  |
| (Yen et al., 2009)           | KAOP                   | Self-administered, paper and pencil?                                             | 34 items, including two subscales of 17 items each                                                                         | Likert scale ranging from strongly disagree (1) to strongly agree (7). Items left without response (4)  | 34-238 in this study         | English?          | Not reported                                                                  |
| (Erdemir et al., 2011)       | KAOP                   | Self-administered, paper and pencil                                              | 34 items, including two subscales of 17 items each (one expressing negative items and the other expressing positive items) | Likert scale, ranging from strongly disagree (1) to strongly agree (6). Items left without response (4) | 34-204.                      | English           | Turkish                                                                       |
| (Kiliç and Adibelli, 2011)   | KAOP                   | Self-administered, paper and pencil                                              | 34 items, including two subscales of 17 items each. After EFA, only 26 items were retained, including a single factor      | 6-point Likert scale                                                                                    | 34-204                       | English           | Turkish                                                                       |
| (Küçükgüçlü et al., 2011)    | KAOP                   | Self-administered, paper and pencil                                              | 34 items, including two subscales of 17 items each                                                                         | Likert scale ranging from strongly disagree (1) to strongly agree (7)                                   | 34-238; in this study 74-224 | English           | Turkish                                                                       |
| (Rejeh et al., 2012)         | KAOP                   | Self-administered, paper and pencil                                              | 34 items, including two subscales of 17 items each (one expressing negative items and the other expressing positive items) | Likert scale ranging from strongly agree (1) to strongly disagree (7). Items left without response (4)  | 34-238; in this study 42-188 | English           | Persian; (article also mentions Norwegian, Greek, Japanese, Chinese, Turkish) |
| (Matarese et al., 2013)      | KAOP                   | Self-administered paper with supervision                                         | 34 items, including 17 items with items worded negatively and 17 items worded positively                                   | Likert scale ranging from strongly agree (1) to strongly disagree (7). Items left without response (4)  | 34-238                       | English?          | Italian (article also mentions Turkish, Greek, Japanese)                      |
| (Vitman-Schorr et al., 2014) | KAOP                   | Self-administered, paper and pencil                                              | 34 items, including two subscales of 17 items each; 5 factors identified in this study                                     | 6-point Likert scale ranging from strongly agree to strongly disagree                                   | 76-195                       | English           | Hebrew                                                                        |

#### Reactions to Ageing Questionnaire (RAQ)

|                        |     |                                     |                                                                                                                                                                                                                                          |                                                                                                        |              |          |                                                                        |
|------------------------|-----|-------------------------------------|------------------------------------------------------------------------------------------------------------------------------------------------------------------------------------------------------------------------------------------|--------------------------------------------------------------------------------------------------------|--------------|----------|------------------------------------------------------------------------|
| (Gething, 1994)        | RAQ | Not reported                        | 35 original items, which were reduced to 30 following testing. The scale was found to include 6 distinct factors including anxiety about the future, physical wellbeing, psychological wellbeing, denial of ageing, isolation, activity. | 6-point scale ranging from agree to disagree                                                           | Not reported | English? | Article mentions translations into Arabic, Italian, Polish, Vietnamese |
| (Netz et al., 2001)    | RAQ | Self-administered, paper and pencil | 27 items with 5 factors identified through testing                                                                                                                                                                                       | 6-point Likert scale ranging from agree to disagree                                                    | Not reported | English? | Not reported                                                           |
| (Getting et al., 2002) | RAQ | Self-administered, paper and pencil | 27 items, including three factors (negativity about ageing, anticipated personality attributes of older age, positivity about ageing)                                                                                                    | 6-point Likert scale on which respondents indicate how much they agree or disagree with each statement | Not reported | English? | Not reported                                                           |

| Author                                   | Specific questionnaire                                                           | Form of administration<br>(e.g. Self or other administered, online or face-to-face) | Subscale/s # of items                                                                                                                                                                                                                                                                                                                                                                                                          | Response options                                                          | Range of scores/scoring                                                                          | Original language | Available translation |
|------------------------------------------|----------------------------------------------------------------------------------|-------------------------------------------------------------------------------------|--------------------------------------------------------------------------------------------------------------------------------------------------------------------------------------------------------------------------------------------------------------------------------------------------------------------------------------------------------------------------------------------------------------------------------|---------------------------------------------------------------------------|--------------------------------------------------------------------------------------------------|-------------------|-----------------------|
| (Gething et al., 2004)                   | RAQ                                                                              | Self-administered?<br>Paper and pencil                                              | 27 items, with three factors identified through testing: negativity about growing older, perceptions of personality characteristics in older age, and positive attributed perceived to be related to aging                                                                                                                                                                                                                     | 6-point Likert ranging from 1 (agree very much) to 6 (disagree very much) | Possible scores range between 27 and 162 with a higher score indicating more positive attitudes. | English           | Swedish               |
| (Helmes and Pachana, 2016)               | RAQ                                                                              | Self-administered, paper and pencil                                                 | Not reported                                                                                                                                                                                                                                                                                                                                                                                                                   | Not reported                                                              | Not reported                                                                                     | Not reported      | Not reported          |
| <b>Tuckman-Lorge Questionnaire (TLQ)</b> |                                                                                  |                                                                                     |                                                                                                                                                                                                                                                                                                                                                                                                                                |                                                                           |                                                                                                  |                   |                       |
| (Tuckman and Lorge, 1954)                | TLQ-% responses                                                                  | Not reported                                                                        | A pre-intervention questionnaire including the original 137 statements from the Tuckman & Lorge questionnaire regarding physical changes with age, mental deterioration, activities and interests, family relationships, conservatism, insecurity, etc. A post-intervention, shorter questionnaire including 30 statements from the original questionnaire and 10 questions from another questionnaire about the older worker. | 0-100%                                                                    | Not reported                                                                                     | English           | Not reported          |
| (Tuckman and Lorge, 1954)                | TLQ-Yes/No responses                                                             | Not reported                                                                        | A pre-intervention questionnaire including the original 137 statements from the Tuckman & Lorge questionnaire. A post-intervention, shorter questionnaire including 30 statements from the original questionnaire and 10 questions from another questionnaire about the older worker.                                                                                                                                          | Yes-No                                                                    | Not reported                                                                                     | English           | Not reported          |
| (Axelrod and Eisdorfer, 1961)            | Tuckman and Lorge Attitudes towards Older People                                 | Paper and pencil                                                                    | 137 statements classified into 13 categories: Conservatism, Activities and Interests, Financial, Physical, Family, Personality Traits, Attitude Toward the Future, Best Time of Life, Insecurity, Mental Deterioration, Sex, Interference, and Cleanliness. Subjects were instructed to apply the statements to different target ages: 35-year-olds, 45-year-olds, 55-year-olds, 65-year-olds, or 75-year-olds.                | Yes/No                                                                    | % reporting yes (0-100)                                                                          | English?          | Not reported          |
| (Eisdorfer, 1966)                        | TLQ-88 most valid items as found in (Axelrod and Eisdorfer, 1961)                | Paper and pencil                                                                    | 88 items with subjects instructed to apply the statements to different target age groups, including 35-year-olds, 45-year-olds, 55-year-olds, 65-year-olds, or 75-year-olds.                                                                                                                                                                                                                                                   | Yes/No                                                                    | Mean Yes responses                                                                               | English?          | Not reported          |
| (Eisdorfer, 1966)                        | TLQ-137 original (Tuckman and Lorge, 1953)                                       | Paper and pencil                                                                    | 137 items with subjects instructed to apply the statements to different target age groups, including 35-year-olds, 45-year-olds, 55-year-olds, 65-year-olds, or 75-year-olds.                                                                                                                                                                                                                                                  | Yes/No                                                                    | Mean Yes responses                                                                               | English?          | Not reported          |
| (Hicks et al., 1976)                     | Tuckman-lorge Attitude Scale (modified version by (Axelrod and Eisdorfer, 1961)) | Not reported                                                                        | 96 items                                                                                                                                                                                                                                                                                                                                                                                                                       | Not reported                                                              | Not reported                                                                                     | Not reported      | Not reported          |

| <b>Author</b>                     | <b>Specific questionnaire</b>                                                            | <b>Form of administration<br/>(e.g. Self or other<br/>administered, online or<br/>face-to-face)</b> |              | <b>Subscale/s # of items</b> | <b>Response options</b> | <b>Range of<br/>scores/scoring</b> | <b>Original<br/>language</b> | <b>Available<br/>translation</b> |
|-----------------------------------|------------------------------------------------------------------------------------------|-----------------------------------------------------------------------------------------------------|--------------|------------------------------|-------------------------|------------------------------------|------------------------------|----------------------------------|
| (Wingard,<br>1980)                | Tuckman-Lorge Attitude<br>Scale(modified version<br>by (Axelrod and<br>Eisdorfer, 1961)) | Not reported                                                                                        | Not reported | Not reported                 | Not reported            | Not reported                       | Not reported                 | Not reported                     |
| (Helmes and<br>Campbell,<br>2009) | TLQ (1952)                                                                               | Both paper and pencil and<br>web-based self-<br>administration                                      | Not reported | Not reported                 | Yes/No                  | Not reported                       | English?                     | Not reported                     |

? indicates that the entry was implicitly reflected in the record. For example, 'self-administered?' indicates that the authors of this article interpreted that this questionnaire was self-administered based on the information provided in the record
